# Supplementary material
Source: publisher site journal article supplement (https://www.dovepress.com/article/406297)
Supplement: Supplementary file 1 [file get_supplementary_file.php]

proteins. Lanes 5–8: serum samples from cord blood of healthy women who delivered full-term infants but without the highly abundant proteins.

**Supplementary Table 1. Total of 450 proteins identified among all serum samples.**

| <b>Accession</b> | <b>Protein names</b>                                                                          | <b>Gene names</b> |
|------------------|-----------------------------------------------------------------------------------------------|-------------------|
| A0A5H1ZRS9       | Immunoglobulin kappa variable 2D-29 OS=Homo sapiens OX=9606 GN=IGKV2D-29 PE=1 SV=1            | IGKV2D-29         |
| Q16881           | Thioredoxin reductase 1, cytoplasmic OS=Homo sapiens OX=9606 GN=TXNRD1 PE=1 SV=3              | TXNRD1            |
| A0A087WSY5       | Carboxypeptidase B2 OS=Homo sapiens OX=9606 GN=CPB2 PE=1 SV=1                                 | CPB2              |
| A0A087WT59       | Transthyretin OS=Homo sapiens OX=9606 GN=TTR PE=1 SV=2                                        | TTR               |
| A0A087WTA8       | Collagen alpha-2(I) chain OS=Homo sapiens OX=9606 GN=COL1A2 PE=1 SV=1                         | COL1A2            |
| H7BYX6           | Neural cell adhesion molecule 1 OS=Homo sapiens OX=9606 GN=NCAM1 PE=1 SV=2                    | NCAM1             |
| A0A087WTM1       | Roundabout homolog 1 OS=Homo sapiens OX=9606 GN=ROBO1 PE=1 SV=1                               | ROBO1             |
| A0A087WTS8       | Heat shock 70 kDa protein 4 OS=Homo sapiens OX=9606 GN=HSPA4 PE=1 SV=1                        | HSPA4             |
| A0A087WUI2       | Heterogeneous nuclear ribonucleoproteins A2/B1 OS=Homo sapiens OX=9606 GN=HNRNPA2B1 PE=1 SV=1 | HNRNPA2B1         |
| A0A087WWU8       | Tropomyosin alpha-3 chain OS=Homo sapiens OX=9606 GN=TPM3 PE=1 SV=1                           | TPM3              |
| A0A087WYF1       | Laminin subunit alpha-2 OS=Homo sapiens OX=9606 GN=LAMA2 PE=1 SV=1                            | LAMA2             |
| Q9Y6R7           | IgGfC-binding protein OS=Homo sapiens OX=9606 GN=FCGBP PE=1 SV=3                              | FCGBP             |
| A0A087WXI5       | Cadherin-1 OS=Homo sapiens OX=9606 GN=CDH1 PE=1 SV=1                                          | CDH1              |
| Q6ICJ4           | Glutathione transferase OS=Homo sapiens OX=9606 GN=GSTT2B PE=1 SV=1                           | GSTT2B            |
| A0A087X089       | C-C motif chemokine OS=Homo sapiens OX=9606 GN=CCL14 PE=1 SV=1                                | CCL14             |
| A0A087X0K0       | Collagen alpha-1(XV) chain OS=Homo sapiens OX=9606 GN=COL15A1 PE=1 SV=1                       | COL15A1           |
| A0A087X0S5       | Collagen alpha-1(VI) chain OS=Homo sapiens OX=9606 GN=COL6A1 PE=1 SV=1                        | COL6A1            |
| A0A087X0T8       | Cell adhesion molecule 1 OS=Homo sapiens OX=9606 GN=CADM1 PE=1 SV=1                           | CADM1             |
| A0A087X1J7       | Glutathione peroxidase OS=Homo sapiens OX=9606 GN=GPX3 PE=1 SV=1                              | GPX3              |
| A0A087X1N7       | Nebulin OS=Homo sapiens OX=9606 GN=NEB                                                        | NEB               |

|                |                                                                                                                                        |                 |
|----------------|----------------------------------------------------------------------------------------------------------------------------------------|-----------------|
|                | PE=1 SV=1                                                                                                                              |                 |
| A0A087X1T7     | Aggrecan core protein OS=Homo sapiens OX=9606<br>GN=ACAN PE=1 SV=1                                                                     | ACAN            |
| A0A087X208     | Agrin OS=Homo sapiens OX=9606 GN=AGRN<br>PE=1 SV=1                                                                                     | AGRN            |
| A0A087X232     | Complement C1s subcomponent OS=Homo sapiens<br>OX=9606 GN=C1S PE=1 SV=1                                                                | C1S             |
| A0A096LPE2     | SAA2-SAA4 readthrough OS=Homo sapiens<br>OX=9606 GN=SAA2-SAA4 PE=3 SV=1                                                                | SAA2-<br>SAA4   |
| H7C0V9         | ABPP (Fragment) OS=Homo sapiens OX=9606<br>GN=APP PE=1 SV=1                                                                            | APP             |
| A0A0A0MRJ<br>7 | Coagulation factor V OS=Homo sapiens OX=9606<br>GN=F5 PE=1 SV=1                                                                        | F5              |
| P01857         | Immunoglobulin heavy constant gamma 1<br>OS=Homo sapiens OX=9606 GN=IGHG1 PE=1<br>SV=1                                                 | IGHG1           |
| A0A0A0MSA<br>9 | Poliovirus receptor OS=Homo sapiens OX=9606<br>GN=PVR PE=1 SV=1                                                                        | PVR             |
| J3KTB8         | Angiotensin-converting enzyme (Fragment)<br>OS=Homo sapiens OX=9606 GN=ACE PE=1<br>SV=1                                                | ACE             |
| A0A0A0MSV<br>6 | Complement C1q subcomponent subunit B<br>(Fragment) OS=Homo sapiens OX=9606<br>GN=C1QB PE=1 SV=6                                       | C1QB            |
| Q8WZ42         | Titin OS=Homo sapiens OX=9606 GN=TTN PE=1<br>SV=4                                                                                      | TTN             |
| F8WDD7         | Actin-related protein 2/3 complex subunit 4<br>OS=Homo sapiens OX=9606 GN=ARPC4 PE=3<br>SV=1                                           | ARPC4           |
| S4R460         | Immunoglobulin heavy variable 3/OR16-9 (non-<br>functional) OS=Homo sapiens OX=9606<br>GN=IGHV3OR16-9 PE=1 SV=2                        | IGHV3OR1<br>6-9 |
| P0DPI2         | Glutamine amidotransferase-like class 1 domain-<br>containing protein 3A, mitochondrial OS=Homo<br>sapiens OX=9606 GN=GATD3A PE=1 SV=1 | GATD3A          |
| Q9NQ79         | Cartilage acidic protein 1 OS=Homo sapiens<br>OX=9606 GN=CRTAC1 PE=1 SV=2                                                              | CRTAC1          |
| A0A0G2JHD<br>9 | Collagen alpha-2(XI) chain (Fragment) OS=Homo<br>sapiens OX=9606 GN=COL11A2 PE=1 SV=1                                                  | COL11A2         |
| A0A0C4DGZ<br>8 | Glycoprotein Ib (Platelet), alpha polypeptide<br>OS=Homo sapiens OX=9606 GN=GP1BA PE=1<br>SV=1                                         | GP1BA           |
| B4DLR2         | Prolyl endopeptidase FAP OS=Homo sapiens<br>OX=9606 GN=FAP PE=1 SV=1                                                                   | FAP             |

|                |                                                                                                        |                  |
|----------------|--------------------------------------------------------------------------------------------------------|------------------|
| A0A0G2JIW1     | Heat shock 70 kDa protein 1B OS=Homo sapiens<br>OX=9606 GN=HSPA1B PE=1 SV=1                            | HSPA1B           |
| A0A0G2JPR0     | C4a anaphylatoxin OS=Homo sapiens OX=9606<br>GN=C4A PE=1 SV=1                                          | C4A              |
| A0A3B3ISJ1     | Vitamin K-dependent protein S OS=Homo sapiens<br>OX=9606 GN=PROS1 PE=1 SV=1                            | PROS1            |
| Q9UNN8         | Endothelial protein C receptor OS=Homo sapiens<br>OX=9606 GN=PROCR PE=1 SV=1                           | PROCR            |
| P20671         | Histone H2A type 1-D OS=Homo sapiens OX=9606<br>GN=H2AC7 PE=1 SV=2                                     | H2AC7            |
| A0A140T9C0     | Tenascin-X OS=Homo sapiens OX=9606<br>GN=TNXB PE=1 SV=1                                                | TNXB             |
| P49908         | Selenoprotein P OS=Homo sapiens OX=9606<br>GN=SELENOP PE=1 SV=3                                        | SELENOP          |
| F8WD96         | Cathepsin D OS=Homo sapiens OX=9606<br>GN=CTSD PE=1 SV=1                                               | CTSD             |
| A0A1B0GV3<br>1 | N-acyl-L-amino-acid amidohydrolase (Fragment)<br>OS=Homo sapiens OX=9606 GN=ABHD14A-<br>ACY1 PE=3 SV=1 | ABHD14A-<br>ACY1 |
| A0A1B0GVK<br>0 | Fibroleukin OS=Homo sapiens OX=9606<br>GN=FGL2 PE=1 SV=1                                               | FGL2             |
| Q5SRN7         | HLA class I histocompatibility antigen, A alpha<br>chain OS=Homo sapiens OX=9606 GN=HLA-A<br>PE=1 SV=2 | HLA-A            |
| A0A4W9A91<br>7 | Immunoglobulin heavy constant gamma 3<br>(Fragment) OS=Homo sapiens OX=9606<br>GN=IGHG3 PE=1 SV=1      | IGHG3            |
| A0A286YEY<br>4 | Immunoglobulin heavy constant gamma 2<br>(Fragment) OS=Homo sapiens OX=9606<br>GN=IGHG2 PE=1 SV=1      | IGHG2            |
| A0A2R8Y4Z<br>1 | Protein HEG homolog 1 (Fragment) OS=Homo<br>sapiens OX=9606 GN=HEG1 PE=1 SV=1                          | HEG1             |
| A0A2R8Y5S7     | Radixin OS=Homo sapiens OX=9606 GN=RDX<br>PE=1 SV=1                                                    | RDX              |
| A0A2R8YGX<br>3 | Tropomyosin alpha-4 chain OS=Homo sapiens<br>OX=9606 GN=TPM4 PE=1 SV=1                                 | TPM4             |
| P69891         | Hemoglobin subunit gamma-1 OS=Homo sapiens<br>OX=9606 GN=HBG1 PE=1 SV=2                                | HBG1             |
| E9PNW4         | CD59 glycoprotein OS=Homo sapiens OX=9606<br>PE=1 SV=1                                                 | 0                |
| A0A2U3TZU<br>2 | Glucose-6-phosphate isomerase OS=Homo sapiens<br>OX=9606 GN=GPI PE=1 SV=1                              | GPI              |
| V9GYE7         | Complement factor H-related protein 2 OS=Homo<br>sapiens OX=9606 GN=CFHR2 PE=1 SV=1                    | CFHR2            |

|            |                                                                                                                     |          |
|------------|---------------------------------------------------------------------------------------------------------------------|----------|
| A0A3B3IRN5 | Fibromodulin OS=Homo sapiens OX=9606 GN=FMOD PE=1 SV=1                                                              | FMOD     |
| A0A3B3IS80 | Fructose-bisphosphate aldolase OS=Homo sapiens OX=9606 GN=ALDOB PE=1 SV=1                                           | ALDOB    |
| C1KBH7     | Fibroblast growth factor receptor 1 OS=Homo sapiens OX=9606 GN=FGFR1 PE=1 SV=1                                      | FGFR1    |
| A0A3B3ISR2 | Complement subcomponent C1r OS=Homo sapiens OX=9606 GN=C1R PE=1 SV=1                                                | C1R      |
| A0A3B3ITK7 | Phosphoglucomutase-1 OS=Homo sapiens OX=9606 GN=PGM1 PE=1 SV=1                                                      | PGM1     |
| A0A3B3IUC7 | Fructose-bisphosphatase OS=Homo sapiens OX=9606 GN=FBP1 PE=1 SV=1                                                   | FBP1     |
| A0A494C1R4 | Protein-tyrosine-phosphatase OS=Homo sapiens OX=9606 GN=PTPRZ1 PE=1 SV=1                                            | PTPRZ1   |
| A0A590UK20 | Ankyrin repeat domain-containing protein 30B OS=Homo sapiens OX=9606 GN=ANKRD30B PE=4 SV=1                          | ANKRD30B |
| A0A5F9ZHD4 | Acetyl-CoA acetyltransferase, mitochondrial OS=Homo sapiens OX=9606 GN=ACAT1 PE=1 SV=1                              | ACAT1    |
| A0A5F9ZHM4 | L-lactate dehydrogenase OS=Homo sapiens OX=9606 GN=LDHB PE=1 SV=1                                                   | LDHB     |
| A0A5K1VW81 | Centrosomal protein of 290 kDa (Fragment) OS=Homo sapiens OX=9606 GN=CEP290 PE=1 SV=2                               | CEP290   |
| A0A5K1VW95 | Malate dehydrogenase OS=Homo sapiens OX=9606 GN=MDH1 PE=1 SV=1                                                      | MDH1     |
| E7EPV7     | Alpha-synuclein OS=Homo sapiens OX=9606 GN=SNCA PE=1 SV=1                                                           | SNCA     |
| A0A669KBE7 | ADAMTS-like protein 4 OS=Homo sapiens OX=9606 GN=ADAMTSL4 PE=1 SV=1                                                 | ADAMTSL4 |
| A0A6Q8PHJ8 | Cadherin-2 (Fragment) OS=Homo sapiens OX=9606 GN=CDH2 PE=4 SV=1                                                     | CDH2     |
| A1L4H1     | Soluble scavenger receptor cysteine-rich domain-containing protein SSC5D OS=Homo sapiens OX=9606 GN=SSC5D PE=1 SV=3 | SSC5D    |
| A2A274     | Aconitate hydratase, mitochondrial OS=Homo sapiens OX=9606 GN=ACO2 PE=1 SV=1                                        | ACO2     |
| H0Y984     | ADP-ribosyl cyclase/cyclic ADP-ribose hydrolase (Fragment) OS=Homo sapiens OX=9606 GN=BST1 PE=1 SV=1                | BST1     |
| B5MCK8     | Inactive glutathione hydrolase 2 OS=Homo sapiens OX=9606 GN=GGT2 PE=1 SV=2                                          | GGT2     |
| A6NIZ1     | Ras-related protein Rap-1b-like protein OS=Homo                                                                     | 0        |

|        |                                                                                          |        |
|--------|------------------------------------------------------------------------------------------|--------|
|        | sapiens OX=9606 PE=2 SV=1                                                                |        |
| H7C3T4 | Peroxiredoxin-4 (Fragment) OS=Homo sapiens OX=9606 GN=PRDX4 PE=1 SV=1                    | PRDX4  |
| E9PJK1 | Tetraspanin OS=Homo sapiens OX=9606 GN=CD81 PE=1 SV=1                                    | CD81   |
| A6XMH3 | Prolactin OS=Homo sapiens OX=9606 GN=PRL PE=1 SV=1                                       | PRL    |
| A6XND1 | Insulin-like growth factor-binding protein 3 OS=Homo sapiens OX=9606 GN=IGFBP3 PE=1 SV=1 | IGFBP3 |
| A8MW49 | Fatty acid-binding protein 1 OS=Homo sapiens OX=9606 GN=FABP1 PE=1 SV=1                  | FABP1  |
| A8MX94 | GST class-pi OS=Homo sapiens OX=9606 GN=GSTP1 PE=1 SV=1                                  | GSTP1  |
| B0QYH4 | Seizure 6-like protein OS=Homo sapiens OX=9606 GN=SEZ6L PE=1 SV=1                        | SEZ6L  |
| B0YIW2 | Apolipoprotein C-III OS=Homo sapiens OX=9606 GN=APOC3 PE=1 SV=1                          | APOC3  |
| B1AHL2 | Fibulin-1 OS=Homo sapiens OX=9606 GN=FBLN1 PE=1 SV=1                                     | FBLN1  |
| B1ALD9 | Periostin OS=Homo sapiens OX=9606 GN=POSTN PE=1 SV=1                                     | POSTN  |
| B3KW70 | Microfibrillar-associated protein 5 OS=Homo sapiens OX=9606 GN=MFAP5 PE=1 SV=1           | MFAP5  |
| B4DQU5 | Ras-related protein Rab-11A OS=Homo sapiens OX=9606 GN=RAB11A PE=1 SV=1                  | RAB11A |
| P0CG48 | Polyubiquitin-C OS=Homo sapiens OX=9606 GN=UBC PE=1 SV=3                                 | UBC    |
| B4DXW1 | Actin-related protein 3 OS=Homo sapiens OX=9606 GN=ACTR3 PE=1 SV=1                       | ACTR3  |
| B4E1Z4 | C3/C5 convertase OS=Homo sapiens OX=9606 PE=1 SV=1                                       | 0      |
| K7EQJ4 | Amyloid-like protein 1 (Fragment) OS=Homo sapiens OX=9606 GN=APLP1 PE=1 SV=1             | APLP1  |
| F8VPF3 | Myosin light polypeptide 6 (Fragment) OS=Homo sapiens OX=9606 GN=MYL6 PE=1 SV=1          | MYL6   |
| B7ZKJ8 | ITIH4 protein OS=Homo sapiens OX=9606 GN=ITIH4 PE=1 SV=1                                 | ITIH4  |
| B7ZL91 | Meprin A subunit OS=Homo sapiens OX=9606 GN=MEP1A PE=1 SV=1                              | MEP1A  |
| B8ZZ08 | LUC7-like ( <i>S. cerevisiae</i> ) (Fragment) OS=Homo sapiens OX=9606 GN=LUC7L PE=1 SV=1 | LUC7L  |
| C9IZP8 | Complement C1s subcomponent (Fragment) OS=Homo sapiens OX=9606 GN=C1S PE=1 SV=1          | C1S    |

|        |                                                                                                                   |         |
|--------|-------------------------------------------------------------------------------------------------------------------|---------|
| C9JB55 | Serotransferrin (Fragment) OS=Homo sapiens<br>OX=9606 GN=TF PE=1 SV=8                                             | TF      |
| C9JEU5 | Fibrinogen gamma chain OS=Homo sapiens<br>OX=9606 GN=FGG PE=1 SV=1                                                | FGG     |
| C9JF17 | Apolipoprotein D (Fragment) OS=Homo sapiens<br>OX=9606 GN=APOD PE=1 SV=1                                          | APOD    |
| F5GZZ9 | Scavenger receptor cysteine-rich type 1 protein<br>M130 OS=Homo sapiens OX=9606 GN=CD163<br>PE=1 SV=1             | CD163   |
| C9JU00 | Fibrinogen gamma chain (Fragment) OS=Homo<br>sapiens OX=9606 GN=FGG PE=1 SV=1                                     | FGG     |
| C9JVG0 | Serotransferrin (Fragment) OS=Homo sapiens<br>OX=9606 GN=TF PE=1 SV=1                                             | TF      |
| P08833 | Insulin-like growth factor-binding protein 1<br>OS=Homo sapiens OX=9606 GN=IGFBP1 PE=1<br>SV=1                    | IGFBP1  |
| C9JYY6 | Neuronal cell adhesion molecule OS=Homo sapiens<br>OX=9606 GN=NRCAM PE=1 SV=3                                     | NRCAM   |
| D2WEZ3 | Neurogenic locus notch homolog protein 2<br>OS=Homo sapiens OX=9606 GN=NOTCH2 PE=1<br>SV=1                        | NOTCH2  |
| D6RA82 | Annexin OS=Homo sapiens OX=9606<br>GN=ANXA3 PE=1 SV=1                                                             | ANXA3   |
| D6RAR4 | Hepatocyte growth factor activator OS=Homo<br>sapiens OX=9606 GN=HGFA PE=1 SV=1                                   | HGFA    |
| D6RF35 | Gc-globulin OS=Homo sapiens OX=9606 GN=GC<br>PE=1 SV=1                                                            | GC      |
| D6RF86 | Cadherin-6 OS=Homo sapiens OX=9606<br>GN=CDH6 PE=1 SV=1                                                           | CDH6    |
| Q99715 | Collagen alpha-1(XII) chain OS=Homo sapiens<br>OX=9606 GN=COL12A1 PE=1 SV=2                                       | COL12A1 |
| Q86W61 | VCAN protein OS=Homo sapiens OX=9606<br>GN=VCAN PE=1 SV=1                                                         | VCAN    |
| E5RIA2 | Ectonucleotide pyrophosphatase/phosphodiesterase<br>family member 2 OS=Homo sapiens OX=9606<br>GN=ENPP2 PE=1 SV=1 | ENPP2   |
| E9PD92 | Glucose-6-phosphate 1-dehydrogenase (Fragment)<br>OS=Homo sapiens OX=9606 GN=G6PD PE=1<br>SV=1                    | G6PD    |
| E9PB77 | Integrin alpha-2 OS=Homo sapiens OX=9606<br>GN=ITGA2 PE=1 SV=1                                                    | ITGA2   |
| E7END6 | Vitamin K-dependent protein C OS=Homo sapiens<br>OX=9606 GN=PROC PE=1 SV=1                                        | PROC    |
| E7EQB2 | Lactotransferrin (Fragment) OS=Homo sapiens                                                                       | LTF     |



|        |                                                                                                        |          |
|--------|--------------------------------------------------------------------------------------------------------|----------|
|        | OX=9606 GN=LTF PE=1 SV=1                                                                               |          |
| Q14240 | Eukaryotic initiation factor 4A-II OS=Homo sapiens OX=9606 GN=EIF4A2 PE=1 SV=2                         | EIF4A2   |
| E7EQR4 | Ezrin OS=Homo sapiens OX=9606 GN=EZR PE=1 SV=3                                                         | EZR      |
| G3XAM2 | Complement factor I OS=Homo sapiens OX=9606 GN=CFI PE=1 SV=1                                           | CFI      |
| E7ETN3 | C3/C5 convertase OS=Homo sapiens OX=9606 PE=1 SV=1                                                     | 0        |
| E9PLT1 | Glycoprotein IIIb OS=Homo sapiens OX=9606 GN=CD36 PE=1 SV=1                                            | CD36     |
| E7EX60 | Neuropilin-1 OS=Homo sapiens OX=9606 GN=NRP1 PE=1 SV=1                                                 | NRP1     |
| E9PBS1 | AIR carboxylase (Fragment) OS=Homo sapiens OX=9606 GN=PAICS PE=1 SV=1                                  | PAICS    |
| E9PD35 | Vascular endothelial growth factor receptor 3 OS=Homo sapiens OX=9606 GN=FLT4 PE=1 SV=1                | FLT4     |
| P07333 | Macrophage colony-stimulating factor 1 receptor OS=Homo sapiens OX=9606 GN=CSF1R PE=1 SV=2             | CSF1R    |
| E9PGN7 | Plasma protease C1 inhibitor OS=Homo sapiens OX=9606 GN=SERPING1 PE=1 SV=1                             | SERPING1 |
| E9PHK0 | Tetranectin OS=Homo sapiens OX=9606 GN=CLEC3B PE=1 SV=1                                                | CLEC3B   |
| E9PLD0 | Ras-related protein Rab-1B OS=Homo sapiens OX=9606 GN=RAB1B PE=1 SV=1                                  | RAB1B    |
| O95967 | EGF-containing fibulin-like extracellular matrix protein 2 OS=Homo sapiens OX=9606 GN=EFEMP2 PE=1 SV=3 | EFEMP2   |
| F2Z2G5 | WAP four-disulfide core domain protein 3 OS=Homo sapiens OX=9606 GN=WFDC3 PE=4 SV=1                    | WFDC3    |
| F5GXJ8 | ATP-dependent DNA helicase DDX11 (Fragment) OS=Homo sapiens OX=9606 GN=DDX11 PE=1 SV=1                 | DDX11    |
| Q13740 | CD166 antigen OS=Homo sapiens OX=9606 GN=ALCAM PE=1 SV=2                                               | ALCAM    |
| F5GXS2 | Alpha-actinin-4 OS=Homo sapiens OX=9606 GN=ACTN4 PE=1 SV=2                                             | ACTN4    |
| P09486 | SPARC OS=Homo sapiens OX=9606 GN=SPARC PE=1 SV=1                                                       | SPARC    |
| F5GZS6 | 4F2 cell-surface antigen heavy chain OS=Homo sapiens OX=9606 GN=SLC3A2 PE=1 SV=1                       | SLC3A2   |

|        |                                                                                                        |           |
|--------|--------------------------------------------------------------------------------------------------------|-----------|
| F5H1C6 | Fermitin family homolog 3 (Fragment) OS=Homo sapiens OX=9606 GN=FERMT3 PE=1 SV=1                       | FERMT3    |
| F5H1N9 | RNA helicase (Fragment) OS=Homo sapiens OX=9606 GN=DDX47 PE=1 SV=1                                     | DDX47     |
| F5H2R5 | Rho GDP-dissociation inhibitor 2 (Fragment) OS=Homo sapiens OX=9606 GN=ARHGDIB PE=1 SV=1               | ARHGDIB   |
| F5H8B0 | Coagulation factor VII OS=Homo sapiens OX=9606 GN=F7 PE=1 SV=2                                         | F7        |
| F6VVT6 | p-selectin (Fragment) OS=Homo sapiens OX=9606 GN=SELP PE=1 SV=1                                        | SELP      |
| F8VTQ5 | Heterogeneous nuclear ribonucleoprotein A1 (Fragment) OS=Homo sapiens OX=9606 GN=HNRNPA1 PE=1 SV=1     | HNRNPA1   |
| F8VVB6 | Protein kinase C-binding protein NELL2 OS=Homo sapiens OX=9606 GN=NELL2 PE=1 SV=1                      | NELL2     |
| F8WEI7 | Galectin-1 OS=Homo sapiens OX=9606 GN=LGALS1 PE=1 SV=1                                                 | LGALS1    |
| G3V1N2 | HCG1745306, isoform CRA_a OS=Homo sapiens OX=9606 GN=HBA2 PE=1 SV=1                                    | HBA2      |
| G3V2W1 | Protein Z-dependent protease inhibitor OS=Homo sapiens OX=9606 GN=SERPINA10 PE=1 SV=1                  | SERPINA10 |
| G3V3A0 | Alpha-1-antichymotrypsin OS=Homo sapiens OX=9606 GN=SERPINA3 PE=1 SV=1                                 | SERPINA3  |
| G3V4U0 | Fibulin-5 OS=Homo sapiens OX=9606 GN=FBLN5 PE=1 SV=1                                                   | FBLN5     |
| G3V5Z7 | Proteasome subunit alpha type OS=Homo sapiens OX=9606 GN=PSMA6 PE=1 SV=1                               | PSMA6     |
| P07942 | Laminin subunit beta-1 OS=Homo sapiens OX=9606 GN=LAMB1 PE=1 SV=2                                      | LAMB1     |
| G3XAK1 | Hepatocyte growth factor-like protein OS=Homo sapiens OX=9606 GN=MST1 PE=1 SV=1                        | MST1      |
| G3XAP6 | Cartilage oligomeric matrix protein OS=Homo sapiens OX=9606 GN=COMP PE=1 SV=1                          | COMP      |
| H0YD13 | CD44 antigen OS=Homo sapiens OX=9606 GN=CD44 PE=1 SV=2                                                 | CD44      |
| P08637 | Low affinity immunoglobulin gamma Fc region receptor III-A OS=Homo sapiens OX=9606 GN=FCGR3A PE=1 SV=2 | FCGR3A    |
| H0Y784 | Doublecortin domain-containing protein 2 (Fragment) OS=Homo sapiens OX=9606 GN=DCDC2 PE=1 SV=1         | DCDC2     |
| P07988 | Pulmonary surfactant-associated protein B OS=Homo sapiens OX=9606 GN=SFTPB PE=1                        | SFTPB     |

|        |                                                                                                                    |                  |
|--------|--------------------------------------------------------------------------------------------------------------------|------------------|
|        | SV=3                                                                                                               |                  |
| H0YAC1 | Plasma kallikrein (Fragment) OS=Homo sapiens<br>OX=9606 GN=KLKB1 PE=1 SV=1                                         | KLKB1            |
| O76061 | Stanniocalcin-2 OS=Homo sapiens OX=9606<br>GN=STC2 PE=1 SV=1                                                       | STC2             |
| H0YCU9 | Transgelin (Fragment) OS=Homo sapiens<br>OX=9606 GN=TAGLN PE=1 SV=1                                                | TAGLN            |
| H0YEA7 | N-acetylglucosamine-1-phosphotransferase subunit<br>gamma (Fragment) OS=Homo sapiens OX=9606<br>GN=GNPTG PE=1 SV=8 | GNPTG            |
| J3KMZ9 | Low-density lipoprotein receptor (Fragment)<br>OS=Homo sapiens OX=9606 GN=LDLR PE=1<br>SV=1                        | LDLR             |
| P05106 | Integrin beta-3 OS=Homo sapiens OX=9606<br>GN=ITGB3 PE=1 SV=2                                                      | ITGB3            |
| H3BP35 | Diphosphomevalonate decarboxylase (Fragment)<br>OS=Homo sapiens OX=9606 GN=MVD PE=1<br>SV=1                        | MVD              |
| H3BSS0 | Metallothionein OS=Homo sapiens OX=9606<br>GN=MT1G PE=1 SV=1                                                       | MT1G             |
| H3BTN5 | Pyruvate kinase (Fragment) OS=Homo sapiens<br>OX=9606 GN=PKM PE=1 SV=1                                             | PKM              |
| H7C2Z6 | Grancalcin (Fragment) OS=Homo sapiens<br>OX=9606 GN=GCA PE=1 SV=1                                                  | GCA              |
| P39060 | Collagen alpha-1(XVIII) chain OS=Homo sapiens<br>OX=9606 GN=COL18A1 PE=1 SV=5                                      | COL18A1          |
| H7BY64 | ZNF511-PRAP1 readthrough (Fragment)<br>OS=Homo sapiens OX=9606 GN=ZNF511-PRAP1<br>PE=4 SV=2                        | ZNF511-<br>PRAP1 |
| H7BZT7 | S-formylglutathione hydrolase (Fragment)<br>OS=Homo sapiens OX=9606 GN=ESD PE=1 SV=1                               | ESD              |
| Q5TCS8 | Adenylate kinase 9 OS=Homo sapiens OX=9606<br>GN=AK9 PE=1 SV=2                                                     | AK9              |
| H9KV31 | Neural cell adhesion molecule 2 OS=Homo sapiens<br>OX=9606 GN=NCAM2 PE=1 SV=2                                      | NCAM2            |
| I3L145 | Sex hormone-binding globulin OS=Homo sapiens<br>OX=9606 GN=SHBG PE=1 SV=1                                          | SHBG             |
| J3KNB4 | Antibacterial peptide FALL-39 OS=Homo sapiens<br>OX=9606 GN=CAMP PE=1 SV=1                                         | CAMP             |
| J3KPA1 | Cysteine-rich secretory protein 3 OS=Homo sapiens<br>OX=9606 GN=CRISP3 PE=1 SV=1                                   | CRISP3           |
| J3KPS3 | Fructose-bisphosphate aldolase OS=Homo sapiens<br>OX=9606 GN=ALDOA PE=1 SV=1                                       | ALDOA            |
| J3KQ18 | D-dopachrome decarboxylase OS=Homo sapiens                                                                         | DDT              |

|        |                                                                                                                    |                 |
|--------|--------------------------------------------------------------------------------------------------------------------|-----------------|
|        | OX=9606 GN=DDT PE=1 SV=1                                                                                           |                 |
| J3QQR8 | Intercellular adhesion molecule 2 (Fragment)<br>OS=Homo sapiens OX=9606 GN=ICAM2 PE=1<br>SV=8                      | ICAM2           |
| O75144 | ICOS ligand OS=Homo sapiens OX=9606<br>GN=ICOSLG PE=1 SV=2                                                         | ICOSLG          |
| K7ELL7 | Glucosidase 2 subunit beta OS=Homo sapiens<br>OX=9606 GN=PRKCSH PE=1 SV=1                                          | PRKCSH          |
| Q99497 | Parkinson disease protein 7 OS=Homo sapiens<br>OX=9606 GN=PARK7 PE=1 SV=2                                          | PARK7           |
| K7EPJ4 | Cartilage intermediate layer protein 2 OS=Homo<br>sapiens OX=9606 GN=CILP2 PE=1 SV=1                               | CILP2           |
| K7ER74 | Apolipoprotein C-II OS=Homo sapiens OX=9606<br>GN=APOC4-APOC2 PE=1 SV=1                                            | APOC4-<br>APOC2 |
| P13646 | Keratin, type I cytoskeletal 13 OS=Homo sapiens<br>OX=9606 GN=KRT13 PE=1 SV=4                                      | KRT13           |
| K7ERG9 | Adipsin OS=Homo sapiens OX=9606 GN=CFD<br>PE=1 SV=1                                                                | CFD             |
| K7ERI9 | Apolipoprotein C-I (Fragment) OS=Homo sapiens<br>OX=9606 GN=APOC1 PE=1 SV=1                                        | APOC1           |
| O00151 | PDZ and LIM domain protein 1 OS=Homo sapiens<br>OX=9606 GN=PDLIM1 PE=1 SV=4                                        | PDLIM1          |
| O00187 | Mannan-binding lectin serine protease 2 OS=Homo<br>sapiens OX=9606 GN=MASP2 PE=1 SV=4                              | MASP2           |
| O00299 | Chloride intracellular channel protein 1 OS=Homo<br>sapiens OX=9606 GN=CLIC1 PE=1 SV=4                             | CLIC1           |
| O00391 | Sulfhydryl oxidase 1 OS=Homo sapiens OX=9606<br>GN=QSOX1 PE=1 SV=3                                                 | QSOX1           |
| O00533 | Neural cell adhesion molecule L1-like protein<br>OS=Homo sapiens OX=9606 GN=CHL1 PE=1<br>SV=4                      | CHL1            |
| O14498 | Immunoglobulin superfamily containing leucine-<br>rich repeat protein OS=Homo sapiens OX=9606<br>GN=ISLR PE=2 SV=1 | ISLR            |
| O14791 | Apolipoprotein L1 OS=Homo sapiens OX=9606<br>GN=APOL1 PE=1 SV=5                                                    | APOL1           |
| O14798 | Tumor necrosis factor receptor superfamily member<br>10C OS=Homo sapiens OX=9606<br>GN=TNFRSF10C PE=1 SV=3         | TNFRSF10<br>C   |
| O15204 | ADAM DEC1 OS=Homo sapiens OX=9606<br>GN=ADAMDEC1 PE=1 SV=2                                                         | ADAMDEC<br>1    |
| O15335 | Chondroadherin OS=Homo sapiens OX=9606<br>GN=CHAD PE=1 SV=2                                                        | CHAD            |
| O43157 | Plexin-B1 OS=Homo sapiens OX=9606                                                                                  | PLXNB1          |

|        |                                                                                                   |         |
|--------|---------------------------------------------------------------------------------------------------|---------|
|        | GN=PLXNB1 PE=1 SV=3                                                                               |         |
| O43505 | Beta-1,4-glucuronyltransferase 1 OS=Homo sapiens<br>OX=9606 GN=B4GAT1 PE=1 SV=1                   | B4GAT1  |
| O43865 | S-adenosylhomocysteine hydrolase-like protein 1<br>OS=Homo sapiens OX=9606 GN=AHCYL1 PE=1<br>SV=2 | AHCYL1  |
| O43866 | CD5 antigen-like OS=Homo sapiens OX=9606<br>GN=CD5L PE=1 SV=1                                     | CD5L    |
| O43895 | Xaa-Pro aminopeptidase 2 OS=Homo sapiens<br>OX=9606 GN=XPNPEP2 PE=1 SV=3                          | XPNPEP2 |
| Q5QNW6 | Histone H2B type 2-F OS=Homo sapiens OX=9606<br>GN=H2BC18 PE=1 SV=3                               | H2BC18  |
| O75083 | WD repeat-containing protein 1 OS=Homo sapiens<br>OX=9606 GN=WDR1 PE=1 SV=4                       | WDR1    |
| O75594 | Peptidoglycan recognition protein 1 OS=Homo<br>sapiens OX=9606 GN=PGLYRP1 PE=1 SV=1               | PGLYRP1 |
| O75636 | Ficolin-3 OS=Homo sapiens OX=9606 GN=FCN3<br>PE=1 SV=2                                            | FCN3    |
| O75874 | Isocitrate dehydrogenase [NADP] cytoplasmic<br>OS=Homo sapiens OX=9606 GN=IDH1 PE=1<br>SV=2       | IDH1    |
| O75882 | Attractin OS=Homo sapiens OX=9606 GN=ATRN<br>PE=1 SV=2                                            | ATRN    |
| O76070 | Gamma-synuclein OS=Homo sapiens OX=9606<br>GN=SNCG PE=1 SV=2                                      | SNCG    |
| O95445 | Apolipoprotein M OS=Homo sapiens OX=9606<br>GN=APOM PE=1 SV=2                                     | APOM    |
| O95467 | Neuroendocrine secretory protein 55 OS=Homo<br>sapiens OX=9606 GN=GNAS PE=2 SV=1                  | GNAS    |
| O95954 | Formimidoyltransferase-cyclodeaminase<br>OS=Homo sapiens OX=9606 GN=FTCD PE=1<br>SV=2             | FTCD    |
| P00338 | L-lactate dehydrogenase A chain OS=Homo sapiens<br>OX=9606 GN=LDHA PE=1 SV=2                      | LDHA    |
| P00352 | Retinal dehydrogenase 1 OS=Homo sapiens<br>OX=9606 GN=ALDH1A1 PE=1 SV=2                           | ALDH1A1 |
| P00367 | Glutamate dehydrogenase 1, mitochondrial<br>OS=Homo sapiens OX=9606 GN=GLUD1 PE=1<br>SV=2         | GLUD1   |
| P00390 | Glutathione reductase, mitochondrial OS=Homo<br>sapiens OX=9606 GN=GSR PE=1 SV=2                  | GSR     |
| P00441 | Superoxide dismutase [Cu-Zn] OS=Homo sapiens<br>OX=9606 GN=SOD1 PE=1 SV=2                         | SOD1    |
| P00450 | Ceruloplasmin OS=Homo sapiens OX=9606                                                             | CP      |

|        |                                                                               |          |
|--------|-------------------------------------------------------------------------------|----------|
|        | GN=CP PE=1 SV=1                                                               |          |
| P00488 | Coagulation factor XIII A chain OS=Homo sapiens<br>OX=9606 GN=F13A1 PE=1 SV=4 | F13A1    |
| P00491 | Purine nucleoside phosphorylase OS=Homo sapiens<br>OX=9606 GN=PNP PE=1 SV=2   | PNP      |
| P00558 | Phosphoglycerate kinase 1 OS=Homo sapiens<br>OX=9606 GN=PGK1 PE=1 SV=3        | PGK1     |
| P00734 | Prothrombin OS=Homo sapiens OX=9606 GN=F2<br>PE=1 SV=2                        | F2       |
| P00738 | Haptoglobin OS=Homo sapiens OX=9606 GN=HP<br>PE=1 SV=1                        | HP       |
| P00739 | Haptoglobin-related protein OS=Homo sapiens<br>OX=9606 GN=HPR PE=2 SV=2       | HPR      |
| P00740 | Coagulation factor IX OS=Homo sapiens OX=9606<br>GN=F9 PE=1 SV=2              | F9       |
| P00742 | Coagulation factor X OS=Homo sapiens OX=9606<br>GN=F10 PE=1 SV=2              | F10      |
| P00747 | Plasminogen OS=Homo sapiens OX=9606<br>GN=PLG PE=1 SV=2                       | PLG      |
| P00748 | Coagulation factor XII OS=Homo sapiens<br>OX=9606 GN=F12 PE=1 SV=3            | F12      |
| P00915 | Carbonic anhydrase 1 OS=Homo sapiens OX=9606<br>GN=CA1 PE=1 SV=2              | CA1      |
| P00918 | Carbonic anhydrase 2 OS=Homo sapiens OX=9606<br>GN=CA2 PE=1 SV=2              | CA2      |
| P01008 | Antithrombin-III OS=Homo sapiens OX=9606<br>GN=SERPINC1 PE=1 SV=1             | SERPINC1 |
| P01009 | Alpha-1-antitrypsin OS=Homo sapiens OX=9606<br>GN=SERPINA1 PE=1 SV=3          | SERPINA1 |
| P01011 | Alpha-1-antichymotrypsin OS=Homo sapiens<br>OX=9606 GN=SERPINA3 PE=1 SV=2     | SERPINA3 |
| P01019 | Angiotensinogen OS=Homo sapiens OX=9606<br>GN=AGT PE=1 SV=1                   | AGT      |
| P01023 | Alpha-2-macroglobulin OS=Homo sapiens<br>OX=9606 GN=A2M PE=1 SV=3             | A2M      |
| P01024 | Complement C3 OS=Homo sapiens OX=9606<br>GN=C3 PE=1 SV=2                      | C3       |
| P01031 | Complement C5 OS=Homo sapiens OX=9606<br>GN=C5 PE=1 SV=4                      | C5       |
| Q5H9A7 | Metalloproteinase inhibitor 1 OS=Homo sapiens<br>OX=9606 GN=TIMP1 PE=1 SV=1   | TIMP1    |
| P01034 | Cystatin-C OS=Homo sapiens OX=9606 GN=CST3<br>PE=1 SV=1                       | CST3     |

|        |                                                                                                  |        |
|--------|--------------------------------------------------------------------------------------------------|--------|
| P01042 | Kininogen-1 OS=Homo sapiens OX=9606<br>GN=KNG1 PE=1 SV=2                                         | KNG1   |
| P01344 | Insulin-like growth factor II OS=Homo sapiens<br>OX=9606 GN=IGF2 PE=1 SV=1                       | IGF2   |
| P01833 | Polymeric immunoglobulin receptor OS=Homo<br>sapiens OX=9606 GN=PIGR PE=1 SV=4                   | PIGR   |
| P01834 | Immunoglobulin kappa constant OS=Homo sapiens<br>OX=9606 GN=IGKC PE=1 SV=2                       | IGKC   |
| P02008 | Hemoglobin subunit zeta OS=Homo sapiens<br>OX=9606 GN=HBZ PE=1 SV=2                              | HBZ    |
| P02042 | Hemoglobin subunit delta OS=Homo sapiens<br>OX=9606 GN=HBD PE=1 SV=2                             | HBD    |
| P02100 | Hemoglobin subunit epsilon OS=Homo sapiens<br>OX=9606 GN=HBE1 PE=1 SV=2                          | HBE1   |
| P02452 | Collagen alpha-1(I) chain OS=Homo sapiens<br>OX=9606 GN=COL1A1 PE=1 SV=5                         | COL1A1 |
| P02458 | Collagen alpha-1(II) chain OS=Homo sapiens<br>OX=9606 GN=COL2A1 PE=1 SV=3                        | COL2A1 |
| P02461 | Collagen alpha-1(III) chain OS=Homo sapiens<br>OX=9606 GN=COL3A1 PE=1 SV=4                       | COL3A1 |
| P02533 | Keratin, type I cytoskeletal 14 OS=Homo sapiens<br>OX=9606 GN=KRT14 PE=1 SV=4                    | KRT14  |
| P02549 | Spectrin alpha chain, erythrocytic 1 OS=Homo<br>sapiens OX=9606 GN=SPTA1 PE=1 SV=5               | SPTA1  |
| P02647 | Apolipoprotein A-I OS=Homo sapiens OX=9606<br>GN=APOA1 PE=1 SV=1                                 | APOA1  |
| P02649 | Apolipoprotein E OS=Homo sapiens OX=9606<br>GN=APOE PE=1 SV=1                                    | APOE   |
| P02671 | Fibrinogen alpha chain OS=Homo sapiens<br>OX=9606 GN=FGA PE=1 SV=2                               | FGA    |
| P02675 | Fibrinogen beta chain OS=Homo sapiens OX=9606<br>GN=FGB PE=1 SV=2                                | FGB    |
| P02679 | Fibrinogen gamma chain OS=Homo sapiens<br>OX=9606 GN=FGG PE=1 SV=3                               | FGG    |
| P02730 | Band 3 anion transport protein OS=Homo sapiens<br>OX=9606 GN=SLC4A1 PE=1 SV=3                    | SLC4A1 |
| P02741 | C-reactive protein OS=Homo sapiens OX=9606<br>GN=CRP PE=1 SV=1                                   | CRP    |
| P02743 | Serum amyloid P-component OS=Homo sapiens<br>OX=9606 GN=APCS PE=1 SV=2                           | APCS   |
| X6RLJ0 | Complement C1q subcomponent subunit A<br>(Fragment) OS=Homo sapiens OX=9606<br>GN=C1QA PE=1 SV=7 | C1QA   |
| P02747 | Complement C1q subcomponent subunit C                                                            | C1QC   |

|        |                                                                             |       |
|--------|-----------------------------------------------------------------------------|-------|
|        | OS=Homo sapiens OX=9606 GN=C1QC PE=1 SV=3                                   |       |
| P02748 | Complement component C9 OS=Homo sapiens OX=9606 GN=C9 PE=1 SV=2             | C9    |
| P02749 | Beta-2-glycoprotein 1 OS=Homo sapiens OX=9606 GN=APOH PE=1 SV=3             | APOH  |
| P02750 | Leucine-rich alpha-2-glycoprotein OS=Homo sapiens OX=9606 GN=LRG1 PE=1 SV=2 | LRG1  |
| P02751 | Fibronectin OS=Homo sapiens OX=9606 GN=FN1 PE=1 SV=5                        | FN1   |
| Q5VY30 | Retinol-binding protein OS=Homo sapiens OX=9606 GN=RBP4 PE=1 SV=2           | RBP4  |
| P02760 | Protein AMBP OS=Homo sapiens OX=9606 GN=AMBP PE=1 SV=1                      | AMBP  |
| P02763 | Alpha-1-acid glycoprotein 1 OS=Homo sapiens OX=9606 GN=ORM1 PE=1 SV=1       | ORM1  |
| P02765 | Alpha-2-HS-glycoprotein OS=Homo sapiens OX=9606 GN=AHSG PE=1 SV=2           | AHSG  |
| P02768 | Albumin OS=Homo sapiens OX=9606 GN=ALB PE=1 SV=2                            | ALB   |
| P02771 | Alpha-fetoprotein OS=Homo sapiens OX=9606 GN=AFP PE=1 SV=1                  | AFP   |
| P02775 | Platelet basic protein OS=Homo sapiens OX=9606 GN=PPBP PE=1 SV=3            | PPBP  |
| P02776 | Platelet factor 4 OS=Homo sapiens OX=9606 GN=PF4 PE=1 SV=2                  | PF4   |
| P02786 | Transferrin receptor protein 1 OS=Homo sapiens OX=9606 GN=TFRC PE=1 SV=2    | TFRC  |
| P02787 | Serotransferrin OS=Homo sapiens OX=9606 GN=TF PE=1 SV=3                     | TF    |
| P02790 | Hemopexin OS=Homo sapiens OX=9606 GN=HPX PE=1 SV=2                          | HPX   |
| P80297 | Metallothionein-1X OS=Homo sapiens OX=9606 GN=MT1X PE=1 SV=1                | MT1X  |
| P03950 | Angiogenin OS=Homo sapiens OX=9606 GN=ANG PE=1 SV=1                         | ANG   |
| P03951 | Coagulation factor XI OS=Homo sapiens OX=9606 GN=F11 PE=1 SV=1              | F11   |
| P03973 | Antileukoproteinase OS=Homo sapiens OX=9606 GN=SLPI PE=1 SV=2               | SLPI  |
| P04003 | C4b-binding protein alpha chain OS=Homo sapiens OX=9606 GN=C4BPA PE=1 SV=2  | C4BPA |
| P04004 | Vitronectin OS=Homo sapiens OX=9606 GN=VTN PE=1 SV=1                        | VTN   |



|        |                                                                                      |          |
|--------|--------------------------------------------------------------------------------------|----------|
| P04040 | Catalase OS=Homo sapiens OX=9606 GN=CAT PE=1 SV=3                                    | CAT      |
| P04083 | Annexin A1 OS=Homo sapiens OX=9606 GN=ANXA1 PE=1 SV=2                                | ANXA1    |
| P04114 | Apolipoprotein B-100 OS=Homo sapiens OX=9606 GN=APOB PE=1 SV=2                       | APOB     |
| P04180 | Phosphatidylcholine-sterol acyltransferase OS=Homo sapiens OX=9606 GN=LCAT PE=1 SV=1 | LCAT     |
| P04196 | Histidine-rich glycoprotein OS=Homo sapiens OX=9606 GN=HRG PE=1 SV=1                 | HRG      |
| P04217 | Alpha-1B-glycoprotein OS=Homo sapiens OX=9606 GN=A1BG PE=1 SV=4                      | A1BG     |
| P04264 | Keratin, type II cytoskeletal 1 OS=Homo sapiens OX=9606 GN=KRT1 PE=1 SV=6            | KRT1     |
| P04275 | von Willebrand factor OS=Homo sapiens OX=9606 GN=VWF PE=1 SV=4                       | VWF      |
| P04406 | Glyceraldehyde-3-phosphate dehydrogenase OS=Homo sapiens OX=9606 GN=GAPDH PE=1 SV=3  | GAPDH    |
| P05019 | Insulin-like growth factor I OS=Homo sapiens OX=9606 GN=IGF1 PE=1 SV=1               | IGF1     |
| P05109 | Protein S100-A8 OS=Homo sapiens OX=9606 GN=S100A8 PE=1 SV=1                          | S100A8   |
| P05154 | Plasma serine protease inhibitor OS=Homo sapiens OX=9606 GN=SERPINA5 PE=1 SV=3       | SERPINA5 |
| P05160 | Coagulation factor XIII B chain OS=Homo sapiens OX=9606 GN=F13B PE=1 SV=3            | F13B     |
| P05164 | Myeloperoxidase OS=Homo sapiens OX=9606 GN=MPO PE=1 SV=1                             | MPO      |
| P05362 | Intercellular adhesion molecule 1 OS=Homo sapiens OX=9606 GN=ICAM1 PE=1 SV=2         | ICAM1    |
| P05543 | Thyroxine-binding globulin OS=Homo sapiens OX=9606 GN=SERPINA7 PE=1 SV=2             | SERPINA7 |
| P05546 | Heparin cofactor 2 OS=Homo sapiens OX=9606 GN=SERPIND1 PE=1 SV=3                     | SERPIND1 |
| P05556 | Integrin beta-1 OS=Homo sapiens OX=9606 GN=ITGB1 PE=1 SV=2                           | ITGB1    |
| P06276 | Cholinesterase OS=Homo sapiens OX=9606 GN=BCHE PE=1 SV=1                             | BCHE     |
| P06396 | Gelsolin OS=Homo sapiens OX=9606 GN=GSN PE=1 SV=1                                    | GSN      |
| P06576 | ATP synthase subunit beta, mitochondrial OS=Homo sapiens OX=9606 GN=ATP5F1B PE=1     | ATP5F1B  |

|        |                                                                                            |          |
|--------|--------------------------------------------------------------------------------------------|----------|
|        | SV=3                                                                                       |          |
| P06681 | Complement C2 OS=Homo sapiens OX=9606<br>GN=C2 PE=1 SV=2                                   | C2       |
| P06702 | Protein S100-A9 OS=Homo sapiens OX=9606<br>GN=S100A9 PE=1 SV=1                             | S100A9   |
| R4GN98 | Protein S100 (Fragment) OS=Homo sapiens<br>OX=9606 GN=S100A6 PE=1 SV=1                     | S100A6   |
| P06727 | Apolipoprotein A-IV OS=Homo sapiens OX=9606<br>GN=APOA4 PE=1 SV=4                          | APOA4    |
| P06732 | Creatine kinase M-type OS=Homo sapiens<br>OX=9606 GN=CKM PE=1 SV=2                         | CKM      |
| P06733 | Alpha-enolase OS=Homo sapiens OX=9606<br>GN=ENO1 PE=1 SV=2                                 | ENO1     |
| P07357 | Complement component C8 alpha chain OS=Homo<br>sapiens OX=9606 GN=C8A PE=1 SV=2            | C8A      |
| P07358 | Complement component C8 beta chain OS=Homo<br>sapiens OX=9606 GN=C8B PE=1 SV=3             | C8B      |
| P07360 | Complement component C8 gamma chain<br>OS=Homo sapiens OX=9606 GN=C8G PE=1 SV=3            | C8G      |
| Q5JP53 | Tubulin beta chain OS=Homo sapiens OX=9606<br>GN=TUBB PE=1 SV=1                            | TUBB     |
| Q5T8F0 | Procathepsin L OS=Homo sapiens OX=9606<br>GN=CTSL PE=1 SV=1                                | CTSL     |
| P07737 | Profilin-1 OS=Homo sapiens OX=9606 GN=PFN1<br>PE=1 SV=2                                    | PFN1     |
| P07738 | Bisphosphoglycerate mutase OS=Homo sapiens<br>OX=9606 GN=BPGM PE=1 SV=2                    | BPGM     |
| P07900 | Heat shock protein HSP 90-alpha OS=Homo sapiens<br>OX=9606 GN=HSP90AA1 PE=1 SV=5           | HSP90AA1 |
| P07996 | Thrombospondin-1 OS=Homo sapiens OX=9606<br>GN=THBS1 PE=1 SV=2                             | THBS1    |
| P07998 | Ribonuclease pancreatic OS=Homo sapiens<br>OX=9606 GN=RNASE1 PE=1 SV=4                     | RNASE1   |
| P08133 | Annexin A6 OS=Homo sapiens OX=9606<br>GN=ANXA6 PE=1 SV=3                                   | ANXA6    |
| P08185 | Corticosteroid-binding globulin OS=Homo sapiens<br>OX=9606 GN=SERPINA6 PE=1 SV=1           | SERPINA6 |
| P08238 | Heat shock protein HSP 90-beta OS=Homo sapiens<br>OX=9606 GN=HSP90AB1 PE=1 SV=4            | HSP90AB1 |
| P08253 | 72 kDa type IV collagenase OS=Homo sapiens<br>OX=9606 GN=MMP2 PE=1 SV=2                    | MMP2     |
| P08294 | Extracellular superoxide dismutase [Cu-Zn]<br>OS=Homo sapiens OX=9606 GN=SOD3 PE=1<br>SV=2 | SOD3     |

|        |                                                                                               |          |
|--------|-----------------------------------------------------------------------------------------------|----------|
| P08311 | Cathepsin G OS=Homo sapiens OX=9606<br>GN=CTSG PE=1 SV=2                                      | CTSG     |
| P08514 | Integrin alpha-IIb OS=Homo sapiens OX=9606<br>GN=ITGA2B PE=1 SV=3                             | ITGA2B   |
| P08519 | Apolipoprotein(a) OS=Homo sapiens OX=9606<br>GN=LPA PE=1 SV=1                                 | LPA      |
| P08571 | Monocyte differentiation antigen CD14 OS=Homo<br>sapiens OX=9606 GN=CD14 PE=1 SV=2            | CD14     |
| P08603 | Complement factor H OS=Homo sapiens OX=9606<br>GN=CFH PE=1 SV=4                               | CFH      |
| P08697 | Alpha-2-antiplasmin OS=Homo sapiens OX=9606<br>GN=SERPINF2 PE=1 SV=3                          | SERPINF2 |
| P08779 | Keratin, type I cytoskeletal 16 OS=Homo sapiens<br>OX=9606 GN=KRT16 PE=1 SV=4                 | KRT16    |
| P09960 | Leukotriene A-4 hydrolase OS=Homo sapiens<br>OX=9606 GN=LTA4H PE=1 SV=2                       | LTA4H    |
| P0C0L4 | Complement C4-A OS=Homo sapiens OX=9606<br>GN=C4A PE=1 SV=2                                   | C4A      |
| P0C0L5 | Complement C4-B OS=Homo sapiens OX=9606<br>GN=C4B PE=1 SV=2                                   | C4B      |
| P0DJ18 | Serum amyloid A-1 protein OS=Homo sapiens<br>OX=9606 GN=SAA1 PE=1 SV=1                        | SAA1     |
| P0DJ19 | Serum amyloid A-2 protein OS=Homo sapiens<br>OX=9606 GN=SAA2 PE=1 SV=1                        | SAA2     |
| P0DOY3 | Immunoglobulin lambda constant 3 OS=Homo<br>sapiens OX=9606 GN=IGLC3 PE=1 SV=1                | IGLC3    |
| P10109 | Adrenodoxin, mitochondrial OS=Homo sapiens<br>OX=9606 GN=FDX1 PE=1 SV=1                       | FDX1     |
| P10451 | Osteopontin OS=Homo sapiens OX=9606<br>GN=SPP1 PE=1 SV=1                                      | SPP1     |
| P10586 | Receptor-type tyrosine-protein phosphatase F<br>OS=Homo sapiens OX=9606 GN=PTPRF PE=1<br>SV=2 | PTPRF    |
| P10599 | Thioredoxin OS=Homo sapiens OX=9606<br>GN=TXN PE=1 SV=3                                       | TXN      |
| P10643 | Complement component C7 OS=Homo sapiens<br>OX=9606 GN=C7 PE=1 SV=2                            | C7       |
| P10809 | 60 kDa heat shock protein, mitochondrial<br>OS=Homo sapiens OX=9606 GN=HSPD1 PE=1<br>SV=2     | HSPD1    |
| P10909 | Clusterin OS=Homo sapiens OX=9606 GN=CLU<br>PE=1 SV=1                                         | CLU      |
| P11021 | Endoplasmic reticulum chaperone BiP OS=Homo<br>sapiens OX=9606 GN=HSPA5 PE=1 SV=2             | HSPA5    |

|        |                                                                                                               |         |
|--------|---------------------------------------------------------------------------------------------------------------|---------|
| P11142 | Heat shock cognate 71 kDa protein OS=Homo sapiens OX=9606 GN=HSPA8 PE=1 SV=1                                  | HSPA8   |
| P11166 | Solute carrier family 2, facilitated glucose transporter member 1 OS=Homo sapiens OX=9606 GN=SLC2A1 PE=1 SV=2 | SLC2A1  |
| P11226 | Mannose-binding protein C OS=Homo sapiens OX=9606 GN=MBL2 PE=1 SV=2                                           | MBL2    |
| P11388 | DNA topoisomerase 2-alpha OS=Homo sapiens OX=9606 GN=TOP2A PE=1 SV=3                                          | TOP2A   |
| P11597 | Cholesteryl ester transfer protein OS=Homo sapiens OX=9606 GN=CETP PE=1 SV=2                                  | CETP    |
| P11717 | Cation-independent mannose-6-phosphate receptor OS=Homo sapiens OX=9606 GN=IGF2R PE=1 SV=3                    | IGF2R   |
| P12107 | Collagen alpha-1(XI) chain OS=Homo sapiens OX=9606 GN=COL11A1 PE=1 SV=4                                       | COL11A1 |
| P12110 | Collagen alpha-2(VI) chain OS=Homo sapiens OX=9606 GN=COL6A2 PE=1 SV=4                                        | COL6A2  |
| P12111 | Collagen alpha-3(VI) chain OS=Homo sapiens OX=9606 GN=COL6A3 PE=1 SV=5                                        | COL6A3  |
| P12955 | Xaa-Pro dipeptidase OS=Homo sapiens OX=9606 GN=PEPD PE=1 SV=3                                                 | PEPD    |
| P13489 | Ribonuclease inhibitor OS=Homo sapiens OX=9606 GN=RNH1 PE=1 SV=2                                              | RNH1    |
| P13639 | Elongation factor 2 OS=Homo sapiens OX=9606 GN=EEF2 PE=1 SV=4                                                 | EEF2    |
| P13645 | Keratin, type I cytoskeletal 10 OS=Homo sapiens OX=9606 GN=KRT10 PE=1 SV=6                                    | KRT10   |
| P13647 | Keratin, type II cytoskeletal 5 OS=Homo sapiens OX=9606 GN=KRT5 PE=1 SV=3                                     | KRT5    |
| P13671 | Complement component C6 OS=Homo sapiens OX=9606 GN=C6 PE=1 SV=3                                               | C6      |
| P13727 | Bone marrow proteoglycan OS=Homo sapiens OX=9606 GN=PRG2 PE=1 SV=2                                            | PRG2    |
| P13796 | Plastin-2 OS=Homo sapiens OX=9606 GN=LCP1 PE=1 SV=6                                                           | LCP1    |
| P14151 | L-selectin OS=Homo sapiens OX=9606 GN=SELL PE=1 SV=2                                                          | SELL    |
| P14324 | Farnesyl pyrophosphate synthase OS=Homo sapiens OX=9606 GN=FDPS PE=1 SV=4                                     | FDPS    |
| P14543 | Nidogen-1 OS=Homo sapiens OX=9606 GN=NID1 PE=1 SV=3                                                           | NID1    |
| P14625 | Endoplasmic reticulum chaperone protein OS=Homo sapiens OX=9606 GN=HSP90B1 PE=1 SV=1                          | HSP90B1 |

|        |                                                                                                |         |
|--------|------------------------------------------------------------------------------------------------|---------|
| P14780 | Matrix metalloproteinase-9 OS=Homo sapiens<br>OX=9606 GN=MMP9 PE=1 SV=3                        | MMP9    |
| P15121 | Aldo-keto reductase family 1 member B1<br>OS=Homo sapiens OX=9606 GN=AKR1B1 PE=1<br>SV=3       | AKR1B1  |
| P15144 | Aminopeptidase N OS=Homo sapiens OX=9606<br>GN=ANPEP PE=1 SV=4                                 | ANPEP   |
| P15169 | Carboxypeptidase N catalytic chain OS=Homo<br>sapiens OX=9606 GN=CPN1 PE=1 SV=1                | CPN1    |
| P15538 | Cytochrome P450 11B1, mitochondrial OS=Homo<br>sapiens OX=9606 GN=CYP11B1 PE=1 SV=5            | CYP11B1 |
| P16035 | Metalloproteinase inhibitor 2 OS=Homo sapiens<br>OX=9606 GN=TIMP2 PE=1 SV=2                    | TIMP2   |
| P16930 | Fumarylacetoacetase OS=Homo sapiens OX=9606<br>GN=FAH PE=1 SV=2                                | FAH     |
| P17174 | Aspartate aminotransferase, cytoplasmic OS=Homo<br>sapiens OX=9606 GN=GOT1 PE=1 SV=3           | GOT1    |
| P17813 | Endoglin OS=Homo sapiens OX=9606 GN=ENG<br>PE=1 SV=2                                           | ENG     |
| P18065 | Insulin-like growth factor-binding protein 2<br>OS=Homo sapiens OX=9606 GN=IGFBP2 PE=1<br>SV=2 | IGFBP2  |
| P18206 | Vinculin OS=Homo sapiens OX=9606 GN=VCL<br>PE=1 SV=4                                           | VCL     |
| P18428 | Lipopolysaccharide-binding protein OS=Homo<br>sapiens OX=9606 GN=LBP PE=1 SV=3                 | LBP     |
| P18669 | Phosphoglycerate mutase 1 OS=Homo sapiens<br>OX=9606 GN=PGAM1 PE=1 SV=2                        | PGAM1   |
| P19320 | Vascular cell adhesion protein 1 OS=Homo sapiens<br>OX=9606 GN=VCAM1 PE=1 SV=1                 | VCAM1   |
| P19652 | Alpha-1-acid glycoprotein 2 OS=Homo sapiens<br>OX=9606 GN=ORM2 PE=1 SV=2                       | ORM2    |
| P19823 | Inter-alpha-trypsin inhibitor heavy chain H2<br>OS=Homo sapiens OX=9606 GN=ITIH2 PE=1<br>SV=2  | ITIH2   |
| P19827 | Inter-alpha-trypsin inhibitor heavy chain H1<br>OS=Homo sapiens OX=9606 GN=ITIH1 PE=1<br>SV=3  | ITIH1   |
| P20618 | Proteasome subunit beta type-1 OS=Homo sapiens<br>OX=9606 GN=PSMB1 PE=1 SV=2                   | PSMB1   |
| P20742 | Pregnancy zone protein OS=Homo sapiens<br>OX=9606 GN=PZP PE=1 SV=4                             | PZP     |
| P20774 | Mimecan OS=Homo sapiens OX=9606 GN=OGN<br>PE=1 SV=1                                            | OGN     |

|        |                                                                                                   |               |
|--------|---------------------------------------------------------------------------------------------------|---------------|
| P20851 | C4b-binding protein beta chain OS=Homo sapiens<br>OX=9606 GN=C4BPB PE=1 SV=1                      | C4BPB         |
| P20908 | Collagen alpha-1(V) chain OS=Homo sapiens<br>OX=9606 GN=COL5A1 PE=1 SV=3                          | COL5A1        |
| P21333 | Filamin-A OS=Homo sapiens OX=9606 GN=FLNA<br>PE=1 SV=4                                            | FLNA          |
| P22314 | Ubiquitin-like modifier-activating enzyme 1<br>OS=Homo sapiens OX=9606 GN=UBA1 PE=1<br>SV=3       | UBA1          |
| Q32Q12 | Nucleoside diphosphate kinase OS=Homo sapiens<br>OX=9606 GN=NME1-NME2 PE=1 SV=1                   | NME1-<br>NME2 |
| P22570 | NADPH:adrenodoxin oxidoreductase,<br>mitochondrial OS=Homo sapiens OX=9606<br>GN=FDXR PE=1 SV=3   | FDXR          |
| P22692 | Insulin-like growth factor-binding protein 4<br>OS=Homo sapiens OX=9606 GN=IGFBP4 PE=1<br>SV=2    | IGFBP4        |
| P22792 | Carboxypeptidase N subunit 2 OS=Homo sapiens<br>OX=9606 GN=CPN2 PE=1 SV=3                         | CPN2          |
| P22891 | Vitamin K-dependent protein Z OS=Homo sapiens<br>OX=9606 GN=PROZ PE=1 SV=2                        | PROZ          |
| P23142 | Fibulin-1 OS=Homo sapiens OX=9606<br>GN=FBLN1 PE=1 SV=4                                           | FBLN1         |
| P23284 | Peptidyl-prolyl cis-trans isomerase B OS=Homo<br>sapiens OX=9606 GN=PPIB PE=1 SV=2                | PPIB          |
| P23470 | Receptor-type tyrosine-protein phosphatase gamma<br>OS=Homo sapiens OX=9606 GN=PTPRG PE=1<br>SV=4 | PTPRG         |
| P23528 | Cofilin-1 OS=Homo sapiens OX=9606 GN=CFL1<br>PE=1 SV=3                                            | CFL1          |
| P24592 | Insulin-like growth factor-binding protein 6<br>OS=Homo sapiens OX=9606 GN=IGFBP6 PE=1<br>SV=1    | IGFBP6        |
| P24593 | Insulin-like growth factor-binding protein 5<br>OS=Homo sapiens OX=9606 GN=IGFBP5 PE=1<br>SV=1    | IGFBP5        |
| P24821 | Tenascin OS=Homo sapiens OX=9606 GN=TNC<br>PE=1 SV=3                                              | TNC           |
| P25311 | Zinc-alpha-2-glycoprotein OS=Homo sapiens<br>OX=9606 GN=AZGP1 PE=1 SV=2                           | AZGP1         |
| P25786 | Proteasome subunit alpha type-1 OS=Homo sapiens<br>OX=9606 GN=PSMA1 PE=1 SV=1                     | PSMA1         |
| P25788 | Proteasome subunit alpha type-3 OS=Homo sapiens<br>OX=9606 GN=PSMA3 PE=1 SV=2                     | PSMA3         |

|        |                                                                                                    |          |
|--------|----------------------------------------------------------------------------------------------------|----------|
| P25815 | Protein S100-P OS=Homo sapiens OX=9606 GN=S100P PE=1 SV=2                                          | S100P    |
| P26038 | Moesin OS=Homo sapiens OX=9606 GN=MSN PE=1 SV=3                                                    | MSN      |
| P26447 | Protein S100-A4 OS=Homo sapiens OX=9606 GN=S100A4 PE=1 SV=1                                        | S100A4   |
| P27105 | Stomatin OS=Homo sapiens OX=9606 GN=STOM PE=1 SV=3                                                 | STOM     |
| P27169 | Serum paraoxonase/arylesterase 1 OS=Homo sapiens OX=9606 GN=PON1 PE=1 SV=3                         | PON1     |
| P27797 | Calreticulin OS=Homo sapiens OX=9606 GN=CALR PE=1 SV=1                                             | CALR     |
| P27918 | Properdin OS=Homo sapiens OX=9606 GN=CFP PE=1 SV=2                                                 | CFP      |
| P28066 | Proteasome subunit alpha type-5 OS=Homo sapiens OX=9606 GN=PSMA5 PE=1 SV=3                         | PSMA5    |
| P28072 | Proteasome subunit beta type-6 OS=Homo sapiens OX=9606 GN=PSMB6 PE=1 SV=4                          | PSMB6    |
| P28074 | Proteasome subunit beta type-5 OS=Homo sapiens OX=9606 GN=PSMB5 PE=1 SV=3                          | PSMB5    |
| P28300 | Protein-lysine 6-oxidase OS=Homo sapiens OX=9606 GN=LOX PE=1 SV=2                                  | LOX      |
| P29279 | CCN family member 2 OS=Homo sapiens OX=9606 GN=CCN2 PE=1 SV=2                                      | CCN2     |
| P29401 | Transketolase OS=Homo sapiens OX=9606 GN=TKT PE=1 SV=3                                             | TKT      |
| P29622 | Kallistatin OS=Homo sapiens OX=9606 GN=SERPINA4 PE=1 SV=3                                          | SERPINA4 |
| P30041 | Peroxiredoxin-6 OS=Homo sapiens OX=9606 GN=PRDX6 PE=1 SV=3                                         | PRDX6    |
| P30043 | Flavin reductase (NADPH) OS=Homo sapiens OX=9606 GN=BLVRB PE=1 SV=3                                | BLVRB    |
| P30048 | Thioredoxin-dependent peroxide reductase, mitochondrial OS=Homo sapiens OX=9606 GN=PRDX3 PE=1 SV=3 | PRDX3    |
| P30086 | Phosphatidylethanolamine-binding protein 1 OS=Homo sapiens OX=9606 GN=PEBP1 PE=1 SV=3              | PEBP1    |
| P30101 | Protein disulfide-isomerase A3 OS=Homo sapiens OX=9606 GN=PDIA3 PE=1 SV=4                          | PDIA3    |
| P30530 | Tyrosine-protein kinase receptor UFO OS=Homo sapiens OX=9606 GN=AXL PE=1 SV=4                      | AXL      |
| P30740 | Leukocyte elastase inhibitor OS=Homo sapiens OX=9606 GN=SERPINB1 PE=1 SV=1                         | SERPINB1 |

|        |                                                                                                                          |          |
|--------|--------------------------------------------------------------------------------------------------------------------------|----------|
| P31146 | Coronin-1A OS=Homo sapiens OX=9606<br>GN=CORO1A PE=1 SV=4                                                                | CORO1A   |
| P31930 | Cytochrome b-c1 complex subunit 1, mitochondrial<br>OS=Homo sapiens OX=9606 GN=UQCRC1 PE=1<br>SV=3                       | UQCRC1   |
| P31937 | 3-hydroxyisobutyrate dehydrogenase,<br>mitochondrial OS=Homo sapiens OX=9606<br>GN=HIBADH PE=1 SV=2                      | HIBADH   |
| P31947 | 14-3-3 protein sigma OS=Homo sapiens OX=9606<br>GN=SFN PE=1 SV=1                                                         | SFN      |
| P31949 | Protein S100-A11 OS=Homo sapiens OX=9606<br>GN=S100A11 PE=1 SV=2                                                         | S100A11  |
| P32119 | Peroxiredoxin-2 OS=Homo sapiens OX=9606<br>GN=PRDX2 PE=1 SV=5                                                            | PRDX2    |
| P32320 | Cytidine deaminase OS=Homo sapiens OX=9606<br>GN=CDA PE=1 SV=2                                                           | CDA      |
| P33151 | Cadherin-5 OS=Homo sapiens OX=9606<br>GN=CDH5 PE=1 SV=5                                                                  | CDH5     |
| P33908 | Mannosyl-oligosaccharide 1,2-alpha-mannosidase<br>IA OS=Homo sapiens OX=9606 GN=MAN1A1<br>PE=1 SV=3                      | MAN1A1   |
| P34096 | Ribonuclease 4 OS=Homo sapiens OX=9606<br>GN=RNASE4 PE=1 SV=3                                                            | RNASE4   |
| P35443 | Thrombospondin-4 OS=Homo sapiens OX=9606<br>GN=THBS4 PE=1 SV=2                                                           | THBS4    |
| P35527 | Keratin, type I cytoskeletal 9 OS=Homo sapiens<br>OX=9606 GN=KRT9 PE=1 SV=3                                              | KRT9     |
| P35555 | Fibrillin-1 OS=Homo sapiens OX=9606 GN=FBN1<br>PE=1 SV=4                                                                 | FBN1     |
| P35579 | Myosin-9 OS=Homo sapiens OX=9606<br>GN=MYH9 PE=1 SV=4                                                                    | MYH9     |
| P35858 | Insulin-like growth factor-binding protein complex<br>acid labile subunit OS=Homo sapiens OX=9606<br>GN=IGFALS PE=1 SV=1 | IGFALS   |
| P35908 | Keratin, type II cytoskeletal 2 epidermal OS=Homo<br>sapiens OX=9606 GN=KRT2 PE=1 SV=2                                   | KRT2     |
| P36955 | Pigment epithelium-derived factor OS=Homo<br>sapiens OX=9606 GN=SERPINF1 PE=1 SV=4                                       | SERPINF1 |
| P37802 | Transgelin-2 OS=Homo sapiens OX=9606<br>GN=TAGLN2 PE=1 SV=3                                                              | TAGLN2   |
| P37837 | Transaldolase OS=Homo sapiens OX=9606<br>GN=TALDO1 PE=1 SV=2                                                             | TALDO1   |
| P38646 | Stress-70 protein, mitochondrial OS=Homo sapiens<br>OX=9606 GN=HSPA9 PE=1 SV=2                                           | HSPA9    |



|        |                                                                                                                |              |
|--------|----------------------------------------------------------------------------------------------------------------|--------------|
| P40121 | Macrophage-capping protein OS=Homo sapiens<br>OX=9606 GN=CAPG PE=1 SV=2                                        | CAPG         |
| P40197 | Platelet glycoprotein V OS=Homo sapiens<br>OX=9606 GN=GP5 PE=1 SV=1                                            | GP5          |
| P40926 | Malate dehydrogenase, mitochondrial OS=Homo sapiens<br>OX=9606 GN=MDH2 PE=1 SV=3                               | MDH2         |
| P41222 | Prostaglandin-H2 D-isomerase OS=Homo sapiens<br>OX=9606 GN=PTGDS PE=1 SV=1                                     | PTGDS        |
| P43121 | Cell surface glycoprotein MUC18 OS=Homo sapiens<br>OX=9606 GN=MCAM PE=1 SV=2                                   | MCAM         |
| P43251 | Biotinidase OS=Homo sapiens OX=9606 GN=BTD<br>PE=1 SV=2                                                        | BTD          |
| P43652 | Afamin OS=Homo sapiens OX=9606 GN=AFM<br>PE=1 SV=1                                                             | AFM          |
| P48163 | NADP-dependent malic enzyme OS=Homo sapiens<br>OX=9606 GN=ME1 PE=1 SV=1                                        | ME1          |
| P48668 | Keratin, type II cytoskeletal 6C OS=Homo sapiens<br>OX=9606 GN=KRT6C PE=1 SV=3                                 | KRT6C        |
| P48740 | Mannan-binding lectin serine protease 1 OS=Homo sapiens<br>OX=9606 GN=MASP1 PE=1 SV=3                          | MASP1        |
| P49189 | 4-trimethylaminobutyraldehyde dehydrogenase<br>OS=Homo sapiens OX=9606 GN=ALDH9A1<br>PE=1 SV=3                 | ALDH9A1      |
| P50395 | Rab GDP dissociation inhibitor beta OS=Homo sapiens<br>OX=9606 GN=GDI2 PE=1 SV=2                               | GDI2         |
| P51884 | Lumican OS=Homo sapiens OX=9606 GN=LUM<br>PE=1 SV=2                                                            | LUM          |
| P53396 | ATP-citrate synthase OS=Homo sapiens OX=9606<br>GN=ACLY PE=1 SV=3                                              | ACLY         |
| P54289 | Voltage-dependent calcium channel subunit alpha-<br>2/delta-1 OS=Homo sapiens OX=9606<br>GN=CACNA2D1 PE=1 SV=3 | CACNA2D<br>1 |
| P55056 | Apolipoprotein C-IV OS=Homo sapiens OX=9606<br>GN=APOC4 PE=1 SV=1                                              | APOC4        |
| P55058 | Phospholipid transfer protein OS=Homo sapiens<br>OX=9606 GN=PLTP PE=1 SV=1                                     | PLTP         |
| P55290 | Cadherin-13 OS=Homo sapiens OX=9606<br>GN=CDH13 PE=1 SV=1                                                      | CDH13        |
| P59666 | Neutrophil defensin 3 OS=Homo sapiens OX=9606<br>GN=DEFA3 PE=1 SV=1                                            | DEFA3        |
| P60174 | Triosephosphate isomerase OS=Homo sapiens<br>OX=9606 GN=TPI1 PE=1 SV=4                                         | TPI1         |
| P60709 | Actin, cytoplasmic 1 OS=Homo sapiens OX=9606<br>GN=ACTB PE=1 SV=1                                              | ACTB         |

|        |                                                                                                       |          |
|--------|-------------------------------------------------------------------------------------------------------|----------|
| P61604 | 10 kDa heat shock protein, mitochondrial<br>OS=Homo sapiens OX=9606 GN=HSPE1 PE=1<br>SV=2             | HSPE1    |
| P61626 | Lysozyme C OS=Homo sapiens OX=9606<br>GN=LYZ PE=1 SV=1                                                | LYZ      |
| P61769 | Beta-2-microglobulin OS=Homo sapiens OX=9606<br>GN=B2M PE=1 SV=1                                      | B2M      |
| P61970 | Nuclear transport factor 2 OS=Homo sapiens<br>OX=9606 GN=NUTF2 PE=1 SV=1                              | NUTF2    |
| P61981 | 14-3-3 protein gamma OS=Homo sapiens OX=9606<br>GN=YWHAG PE=1 SV=2                                    | YWHAG    |
| P62258 | 14-3-3 protein epsilon OS=Homo sapiens OX=9606<br>GN=YWHAE PE=1 SV=1                                  | YWHAE    |
| P62328 | Thymosin beta-4 OS=Homo sapiens OX=9606<br>GN=TMSB4X PE=1 SV=2                                        | TMSB4X   |
| P62805 | Histone H4 OS=Homo sapiens OX=9606<br>GN=H4C1 PE=1 SV=2                                               | H4C1     |
| P62937 | Peptidyl-prolyl cis-trans isomerase A OS=Homo<br>sapiens OX=9606 GN=PPIA PE=1 SV=2                    | PPIA     |
| P62942 | Peptidyl-prolyl cis-trans isomerase FKBP1A<br>OS=Homo sapiens OX=9606 GN=FKBP1A PE=1<br>SV=2          | FKBP1A   |
| P63104 | 14-3-3 protein zeta/delta OS=Homo sapiens<br>OX=9606 GN=YWHAZ PE=1 SV=1                               | YWHAZ    |
| P68133 | Actin, alpha skeletal muscle OS=Homo sapiens<br>OX=9606 GN=ACTA1 PE=1 SV=1                            | ACTA1    |
| Q5VTE0 | Putative elongation factor 1-alpha-like 3 OS=Homo<br>sapiens OX=9606 GN=EEF1A1P5 PE=5 SV=1            | EEF1A1P5 |
| P68363 | Tubulin alpha-1B chain OS=Homo sapiens<br>OX=9606 GN=TUBA1B PE=1 SV=1                                 | TUBA1B   |
| P68871 | Hemoglobin subunit beta OS=Homo sapiens<br>OX=9606 GN=HBB PE=1 SV=2                                   | HBB      |
| P69892 | Hemoglobin subunit gamma-2 OS=Homo sapiens<br>OX=9606 GN=HBG2 PE=1 SV=2                               | HBG2     |
| P69905 | Hemoglobin subunit alpha OS=Homo sapiens<br>OX=9606 GN=HBA1 PE=1 SV=2                                 | HBA1     |
| P78417 | Glutathione S-transferase omega-1 OS=Homo<br>sapiens OX=9606 GN=GSTO1 PE=1 SV=2                       | GSTO1    |
| P80108 | Phosphatidylinositol-glycan-specific phospholipase<br>D OS=Homo sapiens OX=9606 GN=GPLD1 PE=1<br>SV=3 | GPLD1    |
| X6R8F3 | Neutrophil gelatinase-associated lipocalin<br>OS=Homo sapiens OX=9606 GN=LCN2 PE=1<br>SV=1            | LCN2     |

|        |                                                                                                                 |          |
|--------|-----------------------------------------------------------------------------------------------------------------|----------|
| P80370 | Protein delta homolog 1 OS=Homo sapiens OX=9606 GN=DLK1 PE=1 SV=3                                               | DLK1     |
| P80511 | Protein S100-A12 OS=Homo sapiens OX=9606 GN=S100A12 PE=1 SV=2                                                   | S100A12  |
| P81605 | Dermcidin OS=Homo sapiens OX=9606 GN=DCD PE=1 SV=2                                                              | DCD      |
| P98160 | Basement membrane-specific heparan sulfate proteoglycan core protein OS=Homo sapiens OX=9606 GN=HSPG2 PE=1 SV=4 | HSPG2    |
| Q01469 | Fatty acid-binding protein 5 OS=Homo sapiens OX=9606 GN=FABP5 PE=1 SV=3                                         | FABP5    |
| Q02985 | Complement factor H-related protein 3 OS=Homo sapiens OX=9606 GN=CFHR3 PE=1 SV=2                                | CFHR3    |
| Q03167 | Transforming growth factor beta receptor type 3 OS=Homo sapiens OX=9606 GN=TGFBR3 PE=1 SV=3                     | TGFBR3   |
| Q03591 | Complement factor H-related protein 1 OS=Homo sapiens OX=9606 GN=CFHR1 PE=1 SV=2                                | CFHR1    |
| Q04695 | Keratin, type I cytoskeletal 17 OS=Homo sapiens OX=9606 GN=KRT17 PE=1 SV=2                                      | KRT17    |
| Q06033 | Inter-alpha-trypsin inhibitor heavy chain H3 OS=Homo sapiens OX=9606 GN=ITIH3 PE=1 SV=2                         | ITIH3    |
| Q06520 | Sulfotransferase 2A1 OS=Homo sapiens OX=9606 GN=SULT2A1 PE=1 SV=3                                               | SULT2A1  |
| Q06830 | Peroxiredoxin-1 OS=Homo sapiens OX=9606 GN=PRDX1 PE=1 SV=1                                                      | PRDX1    |
| Q07954 | Prolow-density lipoprotein receptor-related protein 1 OS=Homo sapiens OX=9606 GN=LRP1 PE=1 SV=2                 | LRP1     |
| Q08257 | Quinone oxidoreductase OS=Homo sapiens OX=9606 GN=CRYZ PE=1 SV=1                                                | CRYZ     |
| Q08380 | Galectin-3-binding protein OS=Homo sapiens OX=9606 GN=LGALS3BP PE=1 SV=1                                        | LGALS3BP |
| Q08830 | Fibrinogen-like protein 1 OS=Homo sapiens OX=9606 GN=FGL1 PE=1 SV=3                                             | FGL1     |
| Q12794 | Hyaluronidase-1 OS=Homo sapiens OX=9606 GN=HYAL1 PE=1 SV=2                                                      | HYAL1    |
| Q12805 | EGF-containing fibulin-like extracellular matrix protein 1 OS=Homo sapiens OX=9606 GN=EFEMP1 PE=1 SV=2          | EFEMP1   |
| Q12841 | Follistatin-related protein 1 OS=Homo sapiens OX=9606 GN=FSTL1 PE=1 SV=1                                        | FSTL1    |
| Q12860 | Contactin-1 OS=Homo sapiens OX=9606                                                                             | CNTN1    |

|        |                                                                                                            |          |
|--------|------------------------------------------------------------------------------------------------------------|----------|
|        | GN=CNTN1 PE=1 SV=1                                                                                         |          |
| Q12907 | Vesicular integral-membrane protein VIP36<br>OS=Homo sapiens OX=9606 GN=LMAN2 PE=1<br>SV=1                 | LMAN2    |
| Q13011 | Delta(3,5)-Delta(2,4)-dienoyl-CoA isomerase,<br>mitochondrial OS=Homo sapiens OX=9606<br>GN=ECH1 PE=1 SV=2 | ECH1     |
| Q13103 | Secreted phosphoprotein 24 OS=Homo sapiens<br>OX=9606 GN=SPP2 PE=1 SV=1                                    | SPP2     |
| Q13201 | Multimerin-1 OS=Homo sapiens OX=9606<br>GN=MMRN1 PE=1 SV=3                                                 | MMRN1    |
| Q13228 | Methanethiol oxidase OS=Homo sapiens OX=9606<br>GN=SELENBP1 PE=1 SV=2                                      | SELENBP1 |
| Q13332 | Receptor-type tyrosine-protein phosphatase S<br>OS=Homo sapiens OX=9606 GN=PTPRS PE=1<br>SV=3              | PTPRS    |
| Q14118 | Dystroglycan OS=Homo sapiens OX=9606<br>GN=DAG1 PE=1 SV=2                                                  | DAG1     |
| Q14126 | Desmoglein-2 OS=Homo sapiens OX=9606<br>GN=DSG2 PE=1 SV=2                                                  | DSG2     |
| Q14515 | SPARC-like protein 1 OS=Homo sapiens OX=9606<br>GN=SPARCL1 PE=1 SV=2                                       | SPARCL1  |
| Q14520 | Hyaluronan-binding protein 2 OS=Homo sapiens<br>OX=9606 GN=HABP2 PE=1 SV=1                                 | HABP2    |
| Q14574 | Desmocollin-3 OS=Homo sapiens OX=9606<br>GN=DSC3 PE=1 SV=3                                                 | DSC3     |
| Q14624 | Inter-alpha-trypsin inhibitor heavy chain H4<br>OS=Homo sapiens OX=9606 GN=ITIH4 PE=1<br>SV=4              | ITIH4    |
| Q14766 | Latent-transforming growth factor beta-binding<br>protein 1 OS=Homo sapiens OX=9606 GN=LTBP1<br>PE=1 SV=4  | LTBP1    |
| Q15063 | Periostin OS=Homo sapiens OX=9606<br>GN=POSTN PE=1 SV=2                                                    | POSTN    |
| Q15113 | Procollagen C-endopeptidase enhancer 1 OS=Homo<br>sapiens OX=9606 GN=PCOLCE PE=1 SV=2                      | PCOLCE   |
| Q15166 | Serum paraoxonase/lactonase 3 OS=Homo sapiens<br>OX=9606 GN=PON3 PE=1 SV=3                                 | PON3     |
| Q15485 | Ficolin-2 OS=Homo sapiens OX=9606 GN=FCN2<br>PE=1 SV=2                                                     | FCN2     |
| Q15582 | Transforming growth factor-beta-induced protein<br>ig-h3 OS=Homo sapiens OX=9606 GN=TGFBI<br>PE=1 SV=1     | TGFBI    |
| Q15828 | Cystatin-M OS=Homo sapiens OX=9606                                                                         | CST6     |

|        |                                                                                                          |              |
|--------|----------------------------------------------------------------------------------------------------------|--------------|
|        | GN=CST6 PE=1 SV=1                                                                                        |              |
| Q15848 | Adiponectin OS=Homo sapiens OX=9606<br>GN=ADIPOQ PE=1 SV=1                                               | ADIPOQ       |
| Q16270 | Insulin-like growth factor-binding protein 7<br>OS=Homo sapiens OX=9606 GN=IGFBP7 PE=1<br>SV=1           | IGFBP7       |
| Q16610 | Extracellular matrix protein 1 OS=Homo sapiens<br>OX=9606 GN=ECM1 PE=1 SV=2                              | ECM1         |
| Q16658 | Fascin OS=Homo sapiens OX=9606 GN=FSCN1<br>PE=1 SV=3                                                     | FSCN1        |
| Q16706 | Alpha-mannosidase 2 OS=Homo sapiens OX=9606<br>GN=MAN2A1 PE=1 SV=2                                       | MAN2A1       |
| Q16853 | Membrane primary amine oxidase OS=Homo<br>sapiens OX=9606 GN=AOC3 PE=1 SV=3                              | AOC3         |
| Q24JP5 | Transmembrane protein 132A OS=Homo sapiens<br>OX=9606 GN=TMEM132A PE=1 SV=1                              | TMEM132<br>A |
| Q5D862 | Filaggrin-2 OS=Homo sapiens OX=9606<br>GN=FLG2 PE=1 SV=1                                                 | FLG2         |
| Q5T123 | SH3 domain-binding glutamic acid-rich-like protein<br>3 OS=Homo sapiens OX=9606 GN=SH3BGRL3<br>PE=1 SV=1 | SH3BGRL3     |
| Q5W0B1 | ORC ubiquitin ligase 1 OS=Homo sapiens<br>OX=9606 GN=OBI1 PE=1 SV=1                                      | OBI1         |
| Q6B0K9 | Hemoglobin subunit mu OS=Homo sapiens<br>OX=9606 GN=HBM PE=1 SV=1                                        | HBM          |
| Q6E0U4 | Dermokine OS=Homo sapiens OX=9606<br>GN=DMKN PE=1 SV=3                                                   | DMKN         |
| Q6EMK4 | Vasorin OS=Homo sapiens OX=9606 GN=VASN<br>PE=1 SV=1                                                     | VASN         |
| Q6UB98 | Ankyrin repeat domain-containing protein 12<br>OS=Homo sapiens OX=9606 GN=ANKRD12<br>PE=1 SV=3           | ANKRD12      |
| Q6UVK1 | Chondroitin sulfate proteoglycan 4 OS=Homo<br>sapiens OX=9606 GN=CSPG4 PE=1 SV=2                         | CSPG4        |
| Q6UWP8 | Suprabasin OS=Homo sapiens OX=9606<br>GN=SBSN PE=1 SV=2                                                  | SBSN         |
| Q6UX71 | Plexin domain-containing protein 2 OS=Homo<br>sapiens OX=9606 GN=PLXDC2 PE=1 SV=1                        | PLXDC2       |
| Q6UXB8 | Peptidase inhibitor 16 OS=Homo sapiens OX=9606<br>GN=PI16 PE=1 SV=1                                      | PI16         |
| Q6YHK3 | CD109 antigen OS=Homo sapiens OX=9606<br>GN=CD109 PE=1 SV=2                                              | CD109        |
| Q76LX8 | A disintegrin and metalloproteinase with<br>thrombospondin motifs 13 OS=Homo sapiens<br>3                | ADAMTS1<br>3 |

|        |                                                                                                    |           |
|--------|----------------------------------------------------------------------------------------------------|-----------|
|        | OX=9606 GN=ADAMTS13 PE=1 SV=1                                                                      |           |
| Q7Z7M0 | Multiple epidermal growth factor-like domains protein 8 OS=Homo sapiens OX=9606 GN=MEGF8 PE=1 SV=2 | MEGF8     |
| Q86SQ4 | Adhesion G-protein coupled receptor G6 OS=Homo sapiens OX=9606 GN=ADGRG6 PE=1 SV=3                 | ADGRG6    |
| Q86U17 | Serpin A11 OS=Homo sapiens OX=9606 GN=SERPINA11 PE=2 SV=2                                          | SERPINA11 |
| Q86UD1 | Out at first protein homolog OS=Homo sapiens OX=9606 GN=OAF PE=2 SV=1                              | OAF       |
| Q86YZ3 | Hornerin OS=Homo sapiens OX=9606 GN=HRNR PE=1 SV=2                                                 | HRNR      |
| Q8IZF2 | Adhesion G protein-coupled receptor F5 OS=Homo sapiens OX=9606 GN=ADGRF5 PE=1 SV=3                 | ADGRF5    |
| Q8NBJ4 | Golgi membrane protein 1 OS=Homo sapiens OX=9606 GN=GOLM1 PE=1 SV=1                                | GOLM1     |
| Q8NBP7 | Proprotein convertase subtilisin/kexin type 9 OS=Homo sapiens OX=9606 GN=PCSK9 PE=1 SV=3           | PCSK9     |
| Q8NDA2 | Hemicentin-2 OS=Homo sapiens OX=9606 GN=HMCN2 PE=2 SV=3                                            | HMCN2     |
| Q8TDY8 | Immunoglobulin superfamily DCC subclass member 4 OS=Homo sapiens OX=9606 GN=IGDCC4 PE=1 SV=1       | IGDCC4    |
| Q8WWZ8 | Oncoprotein-induced transcript 3 protein OS=Homo sapiens OX=9606 GN=OIT3 PE=1 SV=2                 | OIT3      |
| Q8WZ75 | Roundabout homolog 4 OS=Homo sapiens OX=9606 GN=ROBO4 PE=1 SV=1                                    | ROBO4     |
| Q92520 | Protein FAM3C OS=Homo sapiens OX=9606 GN=FAM3C PE=1 SV=1                                           | FAM3C     |
| Q92820 | Gamma-glutamyl hydrolase OS=Homo sapiens OX=9606 GN=GGH PE=1 SV=2                                  | GGH       |
| Q92859 | Neogenin OS=Homo sapiens OX=9606 GN=NEO1 PE=1 SV=2                                                 | NEO1      |
| Q92954 | Proteoglycan 4 OS=Homo sapiens OX=9606 GN=PRG4 PE=1 SV=3                                           | PRG4      |
| Q96BY2 | Modulator of apoptosis 1 OS=Homo sapiens OX=9606 GN=MOAP1 PE=1 SV=1                                | MOAP1     |
| Q96CX2 | BTB/POZ domain-containing protein KCTD12 OS=Homo sapiens OX=9606 GN=KCTD12 PE=1 SV=1               | KCTD12    |
| Q96PD5 | N-acetylmuramoyl-L-alanine amidase OS=Homo sapiens OX=9606 GN=PGLYRP2 PE=1 SV=1                    | PGLYRP2   |
| Q99436 | Proteasome subunit beta type-7 OS=Homo sapiens                                                     | PSMB7     |

|        |                                                                                                         |          |
|--------|---------------------------------------------------------------------------------------------------------|----------|
|        | OX=9606 GN=PSMB7 PE=1 SV=1                                                                              |          |
| Q99784 | Noelin OS=Homo sapiens OX=9606 GN=OLFM1 PE=1 SV=4                                                       | OLFM1    |
| Q99969 | Retinoic acid receptor responder protein 2 OS=Homo sapiens OX=9606 GN=RARRES2 PE=1 SV=1                 | RARRES2  |
| Q99983 | Osteomodulin OS=Homo sapiens OX=9606 GN=OMD PE=1 SV=1                                                   | OMD      |
| Q9BRF8 | Serine/threonine-protein phosphatase CPPED1 OS=Homo sapiens OX=9606 GN=CPPED1 PE=1 SV=3                 | CPPED1   |
| Q9BTY2 | Plasma alpha-L-fucosidase OS=Homo sapiens OX=9606 GN=FUCA2 PE=1 SV=2                                    | FUCA2    |
| Q9BUN1 | Protein MENT OS=Homo sapiens OX=9606 GN=MENT PE=1 SV=1                                                  | MENT     |
| Q9BWD1 | Acetyl-CoA acetyltransferase, cytosolic OS=Homo sapiens OX=9606 GN=ACAT2 PE=1 SV=2                      | ACAT2    |
| Q9BWP8 | Collectin-11 OS=Homo sapiens OX=9606 GN=COLEC11 PE=1 SV=1                                               | COLEC11  |
| Q9BYJ0 | Fibroblast growth factor-binding protein 2 OS=Homo sapiens OX=9606 GN=FGFBP2 PE=1 SV=1                  | FGFBP2   |
| Q9H4A9 | Dipeptidase 2 OS=Homo sapiens OX=9606 GN=DPEP2 PE=1 SV=3                                                | DPEP2    |
| Q9H8L6 | Multimerin-2 OS=Homo sapiens OX=9606 GN=MMRN2 PE=1 SV=2                                                 | MMRN2    |
| Q9HBR0 | Putative sodium-coupled neutral amino acid transporter 10 OS=Homo sapiens OX=9606 GN=SLC38A10 PE=1 SV=2 | SLC38A10 |
| Q9HCI7 | E3 ubiquitin-protein ligase MSL2 OS=Homo sapiens OX=9606 GN=MSL2 PE=1 SV=2                              | MSL2     |
| Q9HCU4 | Cadherin EGF LAG seven-pass G-type receptor 2 OS=Homo sapiens OX=9606 GN=CELSR2 PE=1 SV=1               | CELSR2   |
| Q9HD89 | Resistin OS=Homo sapiens OX=9606 GN=RETN PE=1 SV=1                                                      | RETN     |
| Q9HDC5 | Junctophilin-1 OS=Homo sapiens OX=9606 GN=JPH1 PE=1 SV=2                                                | JPH1     |
| Q9HDC9 | Adipocyte plasma membrane-associated protein OS=Homo sapiens OX=9606 GN=APMAP PE=1 SV=2                 | APMAP    |
| Q9NPG4 | Protocadherin-12 OS=Homo sapiens OX=9606 GN=PCDH12 PE=1 SV=1                                            | PCDH12   |
| Q9NPH3 | Interleukin-1 receptor accessory protein OS=Homo                                                        | IL1RAP   |

|        |                                                                                                    |         |
|--------|----------------------------------------------------------------------------------------------------|---------|
|        | sapiens OX=9606 GN=IL1RAP PE=1 SV=2                                                                |         |
| Q9NPY3 | Complement component C1q receptor OS=Homo sapiens OX=9606 GN=CD93 PE=1 SV=3                        | CD93    |
| Q9NT22 | EMILIN-3 OS=Homo sapiens OX=9606 GN=EMILIN3 PE=1 SV=2                                              | EMILIN3 |
| Q9NZD4 | Alpha-hemoglobin-stabilizing protein OS=Homo sapiens OX=9606 GN=AHSP PE=1 SV=1                     | AHSP    |
| Q9NZP8 | Complement C1r subcomponent-like protein OS=Homo sapiens OX=9606 GN=C1RL PE=1 SV=2                 | C1RL    |
| Q9UBG0 | C-type mannose receptor 2 OS=Homo sapiens OX=9606 GN=MRC2 PE=1 SV=2                                | MRC2    |
| Q9UBQ6 | Exostosin-like 2 OS=Homo sapiens OX=9606 GN=EXTL2 PE=1 SV=1                                        | EXTL2   |
| Q9UBR2 | Cathepsin Z OS=Homo sapiens OX=9606 GN=CTSZ PE=1 SV=1                                              | CTSZ    |
| Q9UGM5 | Fetuin-B OS=Homo sapiens OX=9606 GN=FETUB PE=1 SV=2                                                | FETUB   |
| Q9UHG3 | Prenylcysteine oxidase 1 OS=Homo sapiens OX=9606 GN=PCYOX1 PE=1 SV=3                               | PCYOX1  |
| Q9ULI3 | Protein HEG homolog 1 OS=Homo sapiens OX=9606 GN=HEG1 PE=1 SV=3                                    | HEG1    |
| Q9UM47 | Neurogenic locus notch homolog protein 3 OS=Homo sapiens OX=9606 GN=NOTCH3 PE=1 SV=2               | NOTCH3  |
| Q9UNW1 | Multiple inositol polyphosphate phosphatase 1 OS=Homo sapiens OX=9606 GN=MINPP1 PE=1 SV=1          | MINPP1  |
| Q9Y490 | Talin-1 OS=Homo sapiens OX=9606 GN=TLN1 PE=1 SV=3                                                  | TLN1    |
| Q9Y5C1 | Angiopoietin-related protein 3 OS=Homo sapiens OX=9606 GN=ANGPTL3 PE=1 SV=1                        | ANGPTL3 |
| Q9Y5Y7 | Lymphatic vessel endothelial hyaluronic acid receptor 1 OS=Homo sapiens OX=9606 GN=LYVE1 PE=1 SV=2 | LYVE1   |
| Q9Y646 | Carboxypeptidase Q OS=Homo sapiens OX=9606 GN=CPQ PE=1 SV=1                                        | CPQ     |
| Q9Y6Z7 | Collectin-10 OS=Homo sapiens OX=9606 GN=COLEC10 PE=1 SV=2                                          | COLEC10 |
| V9GYM3 | Apolipoprotein A-II OS=Homo sapiens OX=9606 GN=APOA2 PE=1 SV=1                                     | APOA2   |



**Supplementary Table 2. Identified all proteins among all serum samples.**

| Accession | Protein           | Gene name | Protein ID | Majority Fasta header      | Number of Peptides | Razor | Unique |
|-----------|-------------------|-----------|------------|----------------------------|--------------------|-------|--------|
| AOA0G2JPF | C4a anaph         | C4A       | AOA0G2JPF  | AOA0G2JPF C4a anaph        | 2                  | 91    | 2      |
| PODJI8    | Serum amy         | SAA1      | PODJI8;E   | PODJI8;E Serum amy         | 2                  | 8     | 8      |
| Q15848    | Adiponect         | ADIPOQ    | Q15848     | Q15848 Adiponect           | 1                  | 3     | 3      |
| P13727    | Bone marri        | PRG2      | P13727;H   | P13727 Bone marri          | 2                  | 4     | 4      |
| P55058    | Phospholi         | PLTP      | P55058     | P55058 Phospholi           | 1                  | 5     | 5      |
| P07988    | Pulmonary         | SFTPB     | P07988;H   | P07988;H Pulmonary         | 3                  | 7     | 7      |
| Q9BTY2    | Plasma al         | FUCA2     | Q9BTY2     | Q9BTY2 Plasma al           | 1                  | 2     | 2      |
| F8WDD7    | Actin-rel         | ARPC4     | F8WDD7;H   | F8WDD7;H Actin-rel         | 7                  | 3     | 3      |
| C9JVG0    | Serotrans         | TF        | C9JVG0     | C9JVG0 Serotrans           | 1                  | 16    | 2      |
| AOA3B3IS  | Fructose-         | ALDOB     | AOA3B3IS   | AOA3B3IS Fructose-         | 4                  | 9     | 9      |
| B4DLR2    | Prolyl er         | FAP       | B4DLR2;A   | B4DLR2;A Prolyl er         | 4                  | 6     | 6      |
| P08185    | Corticost         | SERPINA6  | P08185;G   | P08185 Corticost           | 3                  | 9     | 9      |
| Q9UBQ6    | Exostosir         | EXTL2     | Q9UBQ6;C   | Q9UBQ6;C Exostosir         | 4                  | 4     | 4      |
| P02771    | Alpha-fet         | AFP       | P02771;J   | P02771;J Alpha-fet         | 2                  | 48    | 48     |
| P06681    | Complemer         | C2        | P06681;A   | P06681;A Complemer         | 9                  | 29    | 4      |
| P13645    | Keratin,          | KRT10     | P13645;Q   | P13645 Keratin,            | 18                 | 30    | 30     |
| P02760    | Protein A         | AMBIP     | P02760;S   | P02760 Protein A           | 3                  | 22    | 22     |
| P29622    | Kallistat         | SERPINA4  | P29622     | P29622 Kallistat           | 1                  | 17    | 17     |
| P05546    | Heparin c         | SERPIND1  | P05546     | P05546 Heparin c           | 1                  | 21    | 21     |
| P02679    | Fibrinoge         | FGG       | P02679;C   | P02679;C Fibrinoge         | 2                  | 50    | 50     |
| P01011    | Alpha-1- $\alpha$ | SERPINA3  | P01011;G   | P01011;G Alpha-1- $\alpha$ | 2                  | 21    | 21     |
| P14151    | L-selecti         | SELL      | P14151     | P14151 L-selecti           | 1                  | 7     | 7      |
| P19823    | Inter-alp         | ITIH2     | P19823;Q   | P19823;Q Inter-alp         | 3                  | 39    | 39     |
| Q96PD5    | N-acetyln         | PGLYRP2   | Q96PD5;M   | Q96PD5 N-acetyln           | 3                  | 15    | 15     |
| Q12805    | EGF-cont          | EFEMP1    | Q12805;A   | Q12805;A EGF-cont          | 6                  | 9     | 9      |
| P27169    | Serum par         | PON1      | P27169;F   | P27169 Serum par           | 2                  | 9     | 9      |
| Q9NZP8    | Complemer         | C1RL      | Q9NZP8;H   | Q9NZP8 Complemer           | 6                  | 11    | 10     |
| P43652    | Afamin O          | AFM       | P43652     | P43652 Afamin O            | 1                  | 44    | 44     |
| P19827    | Inter-alp         | ITIH1     | P19827;F   | P19827 Inter-alp           | 5                  | 29    | 29     |
| D6RAR4    | Hepatocyt         | HGFAC     | D6RAR4;Q   | D6RAR4;Q Hepatocyt         | 2                  | 18    | 18     |
| C9JB55    | Serotrans         | TF        | C9JB55     | C9JB55 Serotrans           | 1                  | 7     | 1      |
| Q7Z7M0    | Multiple          | MEGF8     | Q7Z7M0;M   | Q7Z7M0 Multiple            | 3                  | 16    | 16     |
| HOYD13    | CD44 anti         | CD44      | HOYD13;H   | HOYD13;H CD44 anti         | 10                 | 4     | 4      |
| P55290    | Cadherin-         | CDH13     | P55290     | P55290 Cadherin-           | 1                  | 4     | 4      |
| P23470    | Receptor-         | PTPRG     | P23470     | P23470 Receptor-           | 1                  | 3     | 3      |
| G3XAP6    | Cartilage         | COMP      | G3XAP6;P   | G3XAP6;P Cartilage         | 2                  | 15    | 13     |
| P02747    | Complemer         | C1QC      | P02747     | P02747 Complemer           | 1                  | 7     | 7      |
| K7ER74    | Apolipopr         | APOC4-AP  | K7ER74;P   | K7ER74;P Apolipopr         | 4                  | 4     | 4      |
| X6RLJ0    | Complemer         | C1QA      | X6RLJ0;P   | X6RLJ0;P Complemer         | 2                  | 4     | 4      |
| P41222    | Prostagla         | PTGDS     | P41222;Q   | P41222;Q Prostagla         | 3                  | 6     | 6      |
| AOA0C4DG  | Glycoprot         | GP1BA     | AOA0C4DG   | AOA0C4DG Glycoprot         | 2                  | 8     | 8      |
| Q6UWP8    | Suprabasi         | SBSN      | Q6UWP8;K   | Q6UWP8 Suprabasi           | 2                  | 6     | 6      |
| P04217    | Alpha-1B-         | A1BG      | P04217;M   | P04217;M Alpha-1B-         | 2                  | 21    | 21     |
| P00748    | Coagulati         | F12       | P00748     | P00748 Coagulati           | 1                  | 18    | 18     |
| E7END6    | Vitamin K         | PROC      | E7END6;P   | E7END6;P Vitamin K         | 4                  | 8     | 8      |
| P02647    | Apolipopr         | APOA1     | P02647;F   | P02647;F Apolipopr         | 4                  | 53    | 53     |
| P01042    | Kininoger         | KNG1      | P01042     | P01042 Kininoger           | 1                  | 35    | 35     |
| V9GYM3    | Apolipopr         | APOA2     | V9GYM3;V   | V9GYM3;V Apolipopr         | 6                  | 9     | 9      |
| PODOY3    | Immunoglc         | IGLC3     | PODOY3;P   | PODOY3;P Immunoglc         | 9                  | 3     | 3      |
| P68871    | Hemoglobi         | HBB       | P68871;A   | P68871;A Hemoglobi         | 4                  | 17    | 16     |
| P08637    | Low affir         | FCGR3A    | P08637;H   | P08637;H Low affir         | 3                  | 4     | 4      |
| AOA6Q8PH  | Cadherin-         | CDH2      | AOA6Q8PH   | AOA6Q8PH Cadherin-         | 5                  | 4     | 4      |
| Q06830    | Peroxirec         | PRDX1     | Q06830;A   | Q06830;A Peroxirec         | 3                  | 5     | 4      |

|           |                        |                    |                   |           |    |    |    |
|-----------|------------------------|--------------------|-------------------|-----------|----|----|----|
| P23284    | Peptidyl-PPIB          | P23284             | P23284            | Peptidyl- | 1  | 3  | 3  |
| P62942    | Peptidyl-FKBP1A        | P62942;Q1P62942;Q1 | Peptidyl-         |           | 7  | 2  | 2  |
| Q99497    | ParkinsorPARK7         | Q99497;K7Q99497;K7 | Parkinsor         |           | 3  | 3  | 3  |
| HOY984    | ADP-ribosBST1          | HOY984;A€HOY984;A€ | ADP-ribos         |           | 5  | 2  | 2  |
| P18065    | Insulin-IIGFBP2        | P18065;C€P18065;C€ | Insulin-I         |           | 4  | 13 | 13 |
| P02790    | HemopexirHPX           | P02790;Q€P02790;Q€ | Hemopexir         |           | 2  | 36 | 36 |
| AOA1BOGVK | FibroleukFGL2          | AOA1BOGVK          | AOA1BOGVK         | Fibroleuk | 2  | 2  | 2  |
| AOA2R8YGX | TropomyosTPM4          | AOA2R8YGX          | AOA2R8YGX         | Tropomyos | 6  | 3  | 2  |
| 095467    | NeuroendcGNAS          | 095467;HC          | 095467;HC         | Neuroendc | 3  | 2  | 2  |
| AOAOG2JHI | Collagen COL11A2       | AOAOG2JHI          | AOAOG2JHI         | Collagen  | 10 | 5  | 5  |
| P21333    | Filamin- <i>A</i> FLNA | P21333;Q€P21333;Q€ | Filamin- <i>A</i> |           | 5  | 12 | 12 |
| P02775    | Platelet PPBP          | P02775             | P02775            | Platelet  | 1  | 7  | 7  |
| AOA087X0€ | C-C motifCCL14         | AOA087X0€          | AOA087X0€         | C-C motif | 2  | 2  | 2  |
| P08833    | Insulin-IIGFBP1        | P08833;C€P08833;C€ | Insulin-I         |           | 3  | 5  | 5  |
| P35579    | Myosin-9 MYH9          | P35579;P€P35579    | Myosin-9          |           | 6  | 10 | 10 |
| P05019    | Insulin-IIGF1          | P05019             | P05019            | Insulin-I | 1  | 2  | 2  |
| AOA087WWU | TropomyosTPM3          | AOA087WWU          | AOA087WWU         | Tropomyos | 12 | 3  | 3  |
| P02042    | HemoglobiHBD           | P02042;E€P02042;E€ | Hemoglobi         |           | 4  | 14 | 6  |
| 075144    | ICOS lig€ ICOSLG       | 075144;K4          | 075144;K4         | ICOS lig€ | 3  | 2  | 2  |

| Unique peptide | Sequence | Mol. weight | Sequence | Q-value  | Score  | MS/MS | cont id | Case_1   |
|----------------|----------|-------------|----------|----------|--------|-------|---------|----------|
| 1              | 49.1     | 192.87      | 1744     | 0        | 17.826 | 24    | 39      | 27.68953 |
| 3              | 52.5     | 13.532      | 122      | 0        | 65.874 | 23    | 334     | 25.78945 |
| 3              | 21.7     | 26.413      | 244      | 0        | 36.968 | 22    | 526     | 26.80587 |
| 4              | 18.9     | 25.205      | 222      | 0        | 20.252 | 18    | 360     | 25.4566  |
| 5              | 12       | 54.739      | 493      | 0        | 11.413 | 8     | 462     | 23.7382  |
| 7              | 23.1     | 42.117      | 381      | 0        | 14.664 | 12    | 157     | 22.51985 |
| 2              | 4.5      | 54.066      | 467      | 0.008475 | 2.7897 | 6     | 570     | 22.58953 |
| 3              | 34.5     | 13.057      | 113      | 0        | 25.067 | 4     | 31      | 23.48321 |
| 2              | 61.2     | 14.691      | 134      | 0        | 6.3922 | 6     | 104     | 26.1032  |
| 9              | 33.3     | 37.316      | 342      | 0        | 49.924 | 25    | 59      | 24.8319  |
| 6              | 9.7      | 84.861      | 735      | 0        | 40.108 | 10    | 37      | 21.60431 |
| 9              | 26.4     | 45.14       | 405      | 0        | 95.619 | 71    | 320     | 27.96582 |
| 4              | 13.6     | 37.465      | 330      | 0        | 9.5411 | 15    | 590     | 23.24021 |
| 48             | 71.1     | 68.677      | 609      | 0        | 323.31 | 913   | 270     | 31.21327 |
| 4              | 43.6     | 83.267      | 752      | 0        | 51.443 | 31    | 303     | 27.34393 |
| 25             | 46.4     | 58.826      | 584      | 0        | 231.29 | 188   | 357     | 27.86047 |
| 22             | 53.4     | 38.999      | 352      | 0        | 323.31 | 265   | 266     | 32.13433 |
| 17             | 45.2     | 48.541      | 427      | 0        | 76.689 | 116   | 418     | 27.36678 |
| 21             | 46.5     | 57.07       | 499      | 0        | 238.55 | 223   | 298     | 28.14277 |
| 0              | 77.5     | 51.511      | 453      | 0        | 323.31 | 1231  | 255     | 32.77773 |
| 12             | 35.7     | 47.65       | 423      | 0        | 304.91 | 453   | 232     | 29.41561 |
| 7              | 20.4     | 42.187      | 372      | 0        | 27.862 | 40    | 362     | 23.69572 |
| 39             | 36.8     | 106.46      | 946      | 0        | 323.31 | 747   | 381     | 30.62984 |
| 15             | 32.1     | 62.216      | 576      | 0        | 280.54 | 220   | 564     | 27.8172  |
| 9              | 25.8     | 54.64       | 493      | 0        | 65.801 | 40    | 504     | 24.07847 |
| 9              | 30.1     | 39.731      | 355      | 0        | 108.51 | 138   | 409     | 26.2933  |
| 10             | 25.5     | 53.498      | 487      | 0        | 88.103 | 67    | 588     | 24.51641 |
| 44             | 49.4     | 69.068      | 599      | 0        | 323.31 | 514   | 452     | 29.23263 |
| 29             | 34.8     | 101.39      | 911      | 0        | 323.31 | 569   | 382     | 29.08656 |
| 18             | 30.2     | 71.482      | 662      | 0        | 128.53 | 177   | 109     | 24.78077 |
| 1              | 45.3     | 7.99        | 75       | 0        | 21.64  | 35    | 99      | 26.18099 |
| 16             | 7.1      | 303.1       | 2845     | 0        | 44.12  | 60    | 546     | 22.13097 |
| 4              | 18.9     | 22.683      | 206      | 0        | 15.652 | 30    | 154     | 23.49179 |
| 4              | 6.2      | 78.286      | 713      | 0        | 21.259 | 22    | 463     | 21.67706 |
| 3              | 3.3      | 162         | 1445     | 0        | 10.368 | 17    | 397     | 21.54491 |
| 13             | 34.9     | 79.696      | 724      | 0        | 168.62 | 104   | 153     | 24.29467 |
| 7              | 27.8     | 25.773      | 245      | 0        | 86.372 | 92    | 260     | 28.12021 |
| 4              | 20.2     | 20.049      | 178      | 0        | 8.7872 | 57    | 183     | 28.60438 |
| 4              | 10       | 23.351      | 220      | 0        | 17.114 | 40    | 259     | 28.02417 |
| 6              | 31.6     | 21.029      | 190      | 0        | 53.384 | 51    | 449     | 24.72692 |
| 8              | 13.6     | 68.954      | 626      | 0        | 147.04 | 56    | 36      | 23.60377 |
| 6              | 23.7     | 60.54       | 590      | 0        | 19.114 | 26    | 541     | 21.46518 |
| 21             | 47.1     | 54.253      | 495      | 0        | 323.31 | 567   | 287     | 28.49717 |
| 18             | 41.1     | 67.791      | 615      | 0        | 204.11 | 167   | 227     | 25.11914 |
| 8              | 18.6     | 55.389      | 495      | 0        | 44.642 | 54    | 117     | 22.3024  |
| 53             | 91.4     | 30.777      | 267      | 0        | 323.31 | 1739  | 251     | 31.92057 |
| 35             | 38.4     | 71.957      | 644      | 0        | 323.31 | 586   | 239     | 29.30219 |
| 9              | 40.6     | 14.914      | 133      | 0        | 138.64 | 290   | 608     | 31.5517  |
| 3              | 37.7     | 11.265      | 106      | 0        | 62.339 | 14    | 336     | 23.01248 |
| 9              | 86.4     | 15.998      | 147      | 0        | 272.96 | 438   | 481     | 29.51629 |
| 2              | 16.1     | 29.089      | 254      | 0        | 12.841 | 35    | 155     | 22.09982 |
| 4              | 10.9     | 43.626      | 394      | 0        | 8.3141 | 7     | 72      | 20.85941 |
| 4              | 31.7     | 22.11       | 199      | 0        | 8.2477 | 10    | 498     | 20.29318 |

|    |      |        |      |          |        |      |     |          |
|----|------|--------|------|----------|--------|------|-----|----------|
| 3  | 15.7 | 23.742 | 216  | 0        | 5.8288 | 8    | 396 | 19.16618 |
| 2  | 25   | 11.951 | 108  | 0        | 23.75  | 9    | 476 | 20.76816 |
| 3  | 20.6 | 19.891 | 189  | 0        | 6.5619 | 5    | 181 | 20.40098 |
| 2  | 12.9 | 20.971 | 186  | 0        | 4.5842 | 5    | 75  | 20.31932 |
| 13 | 44.6 | 34.814 | 325  | 0        | 80.314 | 85   | 375 | 22.7997  |
| 36 | 66   | 51.676 | 462  | 0        | 323.31 | 1281 | 275 | 28.01569 |
| 2  | 12.4 | 25.363 | 225  | 0        | 8.9662 | 10   | 47  | 19.89583 |
| 2  | 20.8 | 20.985 | 183  | 0.001965 | 4.0887 | 2    | 53  | 19.85316 |
| 2  | 7.8  | 28.028 | 245  | 0        | 4.3803 | 6    | 210 | 19.74895 |
| 5  | 27.3 | 35.97  | 333  | 0        | 16.64  | 11   | 35  | 20.10068 |
| 12 | 6.9  | 280.74 | 2647 | 0        | 45.854 | 19   | 388 | 20.74517 |
| 7  | 40.6 | 13.894 | 128  | 0        | 196.79 | 83   | 271 | 23.58405 |
| 2  | 33.9 | 13.06  | 115  | 0        | 11.551 | 7    | 14  | 19.6182  |
| 5  | 27.4 | 27.903 | 259  | 0        | 15.23  | 15   | 105 | 19.90018 |
| 10 | 8.1  | 226.53 | 1960 | 0        | 23.21  | 13   | 439 | 19.19158 |
| 2  | 14.9 | 21.841 | 195  | 0.006981 | 2.9415 | 5    | 291 | 19.19916 |
| 2  | 16.3 | 26.42  | 227  | 0        | 6.7806 | 9    | 9   | 19.71763 |
| 6  | 85   | 16.055 | 147  | 0        | 72.54  | 22   | 244 | 20.38338 |
| 2  | 6.6  | 33.348 | 302  | 0.001845 | 3.5422 | 9    | 179 | 20.05597 |

| Case_2   | Case_3   | Case_4   | Control_1 | Control_2 | Control_3 | Control_4 | Group_Cas | Group_Cor |
|----------|----------|----------|-----------|-----------|-----------|-----------|-----------|-----------|
| 27.54422 | 26.8804  | 19.71144 | 18.99584  | 19.49563  | 19.23646  | 21.35958  | 46040355  | 895219    |
| 26.42784 | 19.88624 | 24.49808 | 20.50527  | 19.77416  | 16.13859  | 19.96771  | 18620669  | 560529.9  |
| 26.87853 | 27.53014 | 26.66234 | 23.08279  | 18.44433  | 23.69392  | 23.14104  | 1.31E+08  | 4465898   |
| 24.47853 | 23.46961 | 22.8977  | 19.65947  | 20.23812  | 19.09997  | 18.94362  | 17679947  | 733936.5  |
| 23.55333 | 23.62176 | 20.48922 | 18.65889  | 18.44113  | 20.14715  | 19.40991  | 7563528   | 587517.5  |
| 22.59701 | 22.76539 | 22.31013 | 21.99359  | 19.62444  | 18.32575  | 18.87562  | 6132716   | 854576    |
| 22.20404 | 22.78708 | 22.20869 | 18.52859  | 18.40263  | 21.48717  | 20.65095  | 5719015   | 892402.1  |
| 19.81404 | 20.16508 | 22.2524  | 18.34678  | 19.32472  | 18.54803  | 19.89476  | 2822772   | 534775.2  |
| 26.46003 | 27.56427 | 23.60637 | 23.64174  | 23.62132  | 23.55227  | 23.64339  | 64084269  | 12844797  |
| 22.64843 | 22.29373 | 23.50664 | 21.37571  | 22.14277  | 21.47021  | 20.37871  | 10473027  | 2657883   |
| 21.85654 | 22.11521 | 21.42142 | 18.39981  | 19.44388  | 20.67027  | 21.16051  | 3525439   | 991062.7  |
| 28.19845 | 28.9038  | 27.8484  | 26.9419   | 26.68284  | 26.50867  | 25.94195  | 3.15E+08  | 96153689  |
| 22.05593 | 22.55604 | 22.42568 | 21.14015  | 20.5617   | 20.81261  | 21.48409  | 6224229   | 2096623   |
| 30.44875 | 31.79277 | 30.76825 | 29.39143  | 30.82692  | 28.23361  | 29.75608  | 2.23E+09  | 7.87E+08  |
| 26.85638 | 27.16863 | 25.77946 | 24.62873  | 25.79365  | 25.96413  | 24.80124  | 1.16E+08  | 41222779  |
| 26.96972 | 28.18947 | 25.849   | 25.89747  | 25.33378  | 26.50247  | 25.28673  | 1.56E+08  | 56631885  |
| 31.50294 | 31.35484 | 30.31354 | 29.99968  | 30.02657  | 29.86818  | 29.79476  | 2.69E+09  | 1.02E+09  |
| 27.02179 | 26.68512 | 26.59619 | 25.42826  | 25.61065  | 25.39565  | 25.84086  | 1.27E+08  | 49772837  |
| 27.60887 | 27.59463 | 27.576   | 26.6584   | 26.82978  | 27.08497  | 27.00539  | 2.23E+08  | 1.25E+08  |
| 32.45253 | 32.12583 | 32.35484 | 31.54816  | 31.8427   | 31.83293  | 32.03072  | 5.78E+09  | 3.77E+09  |
| 30.351   | 30.27309 | 30.20571 | 29.70568  | 29.25444  | 29.51775  | 29.31255  | 1.12E+09  | 7.32E+08  |
| 23.76699 | 23.54934 | 24.11482 | 24.36312  | 24.5474   | 24.70614  | 24.05482  | 14421485  | 22413614  |
| 30.0898  | 30.88584 | 30.30106 | 30.98223  | 31.33995  | 31.02986  | 31.17343  | 1.49E+09  | 2.35E+09  |
| 27.06384 | 27.21743 | 26.69272 | 27.85329  | 27.88687  | 28.17455  | 27.54289  | 1.54E+08  | 2.44E+08  |
| 23.70525 | 23.52397 | 23.98537 | 24.4642   | 24.31458  | 24.73211  | 24.45413  | 14842843  | 23583139  |
| 26.90392 | 27.34257 | 27.02401 | 27.56311  | 27.59392  | 27.65922  | 27.47212  | 1.24E+08  | 2E+08     |
| 24.63356 | 24.69195 | 24.51153 | 25.31686  | 25.41864  | 25.31057  | 25.06755  | 25225222  | 40696594  |
| 29.23923 | 29.42402 | 29.51708 | 29.98712  | 30.18884  | 30.16267  | 29.9901   | 6.86E+08  | 1.14E+09  |
| 29.17622 | 29.68799 | 29.3677  | 29.95546  | 30.32163  | 30.07814  | 29.9087   | 6.75E+08  | 1.12E+09  |
| 24.95029 | 24.68164 | 24.90298 | 25.53641  | 25.42249  | 25.84338  | 25.4607   | 29802261  | 49665693  |
| 26.79563 | 26.42156 | 27.28145 | 27.14151  | 27.59811  | 27.53371  | 27.6401   | 1.07E+08  | 1.87E+08  |
| 21.25298 | 22.25603 | 22.57136 | 22.83582  | 22.87371  | 23.09349  | 22.70193  | 4350757   | 7698988   |
| 22.94428 | 24.09571 | 24.20926 | 24.49118  | 24.52379  | 24.6572   | 24.40022  | 13488815  | 24026055  |
| 21.35923 | 21.87909 | 22.66277 | 22.59332  | 22.77878  | 22.60993  | 22.96819  | 3898636   | 6993377   |
| 20.93517 | 22.01103 | 22.37992 | 22.71856  | 22.50038  | 22.50981  | 22.56197  | 3449026   | 6238125   |
| 23.12348 | 24.00804 | 24.63694 | 24.94548  | 24.64883  | 24.94744  | 24.95429  | 16961752  | 30748465  |
| 27.6977  | 27.6293  | 28.82393 | 29.10704  | 29.0282   | 29.1123   | 28.56307  | 2.81E+08  | 5.2E+08   |
| 29.0853  | 28.34545 | 28.60827 | 29.6635   | 29.39274  | 30.03879  | 29.1263   | 4.24E+08  | 7.89E+08  |
| 26.92025 | 27.74932 | 28.04526 | 28.82119  | 28.59224  | 28.57499  | 28.38443  | 2.16E+08  | 4.05E+08  |
| 25.51617 | 25.19596 | 25.849   | 26.25516  | 26.03051  | 26.37637  | 26.27916  | 41945464  | 78997198  |
| 22.81202 | 23.87755 | 24.06299 | 24.16844  | 24.85358  | 24.63201  | 24.37571  | 12618899  | 23849132  |
| 21.55487 | 22.13737 | 22.45083 | 23.67896  | 22.53039  | 23.02118  | 22.23739  | 3919028   | 7649742   |
| 28.6635  | 28.92181 | 29.28244 | 29.89308  | 29.95809  | 29.82002  | 29.6483   | 4.81E+08  | 9.54E+08  |
| 26.19131 | 25.58328 | 25.78574 | 26.65567  | 26.66953  | 26.86231  | 26.48261  | 53382630  | 1.07E+08  |
| 23.00388 | 23.08016 | 23.40419 | 24.15615  | 24.14157  | 24.20165  | 23.67282  | 8089713   | 17285344  |
| 32.47834 | 32.44149 | 32.97496 | 33.61489  | 33.60554  | 33.64463  | 33.43949  | 5.88E+09  | 1.28E+10  |
| 29.53031 | 30.16734 | 30.60072 | 30.98529  | 31.09629  | 31.18547  | 30.97719  | 1E+09     | 2.24E+09  |
| 30.79606 | 31.7963  | 32.14789 | 32.46888  | 32.93178  | 32.90435  | 32.71049  | 3.19E+09  | 7.24E+09  |
| 23.18217 | 23.36693 | 23.82949 | 24.62756  | 23.68731  | 26.15956  | 25.27498  | 10675249  | 32128542  |
| 29.30793 | 28.97235 | 30.85875 | 31.08702  | 31.65181  | 30.83522  | 31.77368  | 8.51E+08  | 2.71E+09  |
| 22.98768 | 22.93115 | 24.62305 | 25.01992  | 24.67481  | 25.7681   | 24.20754  | 9375262   | 31691551  |
| 20.41855 | 18.70635 | 21.90852 | 22.26465  | 22.56305  | 21.92241  | 22.19958  | 1455628   | 4944602   |
| 19.10786 | 18.58041 | 20.85274 | 21.9884   | 21.8053   | 20.29652  | 21.92042  | 856770.9  | 2971292   |

18. 79115 19. 38919 21. 03349 21. 01482 22. 10079 21. 4437 21. 23368 791923. 8 2861312  
19. 41922 19. 36642 19. 07576 21. 31981 22. 1739 20. 82062 21. 79122 826921. 9 3020567  
19. 5786 19. 45206 18. 15088 22. 32825 21. 83838 20. 11088 21. 07361 689709. 8 2650403  
19. 43526 18. 5772 19. 46507 20. 36582 22. 55009 22. 27804 20. 52182 715808. 7 2823283  
22. 66023 22. 00871 23. 94851 25. 13414 24. 86656 24. 61953 25. 03884 7582739 31629465  
29. 23421 28. 16658 29. 36328 31. 31651 30. 68186 31. 42056 29. 84149 4. 35E+08 1. 89E+09  
20. 47427 18. 92442 21. 44471 22. 791 21. 5838 22. 06609 23. 0589 1191881 5439147  
20. 28357 21. 60942 18. 40886 20. 56849 23. 21474 22. 38551 23. 00489 1077125 5140256  
19. 49219 19. 32925 19. 3446 22. 49899 22. 02249 21. 76931 21. 15132 730612. 2 3807803  
18. 57247 21. 79166 21. 02093 22. 88435 23. 0477 23. 07401 22. 76306 1356479 8059627  
19. 1139 18. 36433 20. 36607 20. 90558 23. 85776 21. 39754 23. 00325 821197. 6 5131797  
26. 41735 24. 18722 27. 1865 26. 84146 29. 74044 27. 06671 28. 56776 42583213 2. 79E+08  
19. 57187 17. 55275 19. 60074 22. 53298 22. 69829 21. 07063 20. 90626 556448. 6 3656524  
20. 01303 21. 11055 23. 30994 22. 82509 24. 39917 22. 71473 25. 28711 2221997 14671634  
18. 38043 20. 16725 22. 33473 22. 48719 23. 27711 22. 14898 23. 47445 1062106 7544174  
20. 80555 20. 07241 20. 55361 23. 05222 23. 32704 23. 07948 22. 89195 1169679 8914193  
18. 89502 18. 16424 22. 52846 22. 70231 23. 27668 22. 25 23. 31852 929655. 6 7755985  
23. 67605 19. 47682 23. 40808 24. 39192 24. 78531 24. 12629 26. 01538 3493116 29818903  
17. 33247 18. 50053 23. 04442 23. 00987 23. 1458 23. 58566 22. 80079 871623. 8 9214858

Group\_Caspvalue

51. 42915 0. 029324  
33. 21976 0. 029751  
29. 41957 0. 007623  
24. 0892 0. 00036  
12. 87371 0. 005704  
7. 176326 0. 012903  
6. 408562 0. 014218  
5. 278428 0. 043536  
4. 989123 0. 032264  
3. 940365 0. 025748  
3. 557231 0. 028761  
3. 27224 0. 001683  
2. 968693 0. 002625  
2. 835785 0. 048501  
2. 809208 0. 02244  
2. 755006 0. 049687  
2. 64656 0. 010326  
2. 546676 0. 000565  
1. 785013 0. 002456  
1. 530609 0. 010617  
1. 530227 0. 043328  
0. 643425 0. 013579  
0. 635191 0. 014784  
0. 629989 0. 046909  
0. 629384 0. 004956  
0. 623672 0. 022414  
0. 619836 0. 000211  
0. 603345 0. 000177  
0. 60025 0. 003911  
0. 600057 0. 000626  
0. 570995 0. 022743  
0. 565108 0. 031026  
0. 561424 0. 031265  
0. 557475 0. 027447  
0. 552895 0. 03527  
0. 551629 0. 041752  
0. 541536 0. 027025  
0. 53794 0. 011389  
0. 532752 0. 017166  
0. 530974 0. 010654  
0. 529114 0. 026312  
0. 512308 0. 049761  
0. 503952 0. 001689  
0. 500811 0. 005517  
0. 46801 0. 005915  
0. 459362 0. 002234  
0. 447227 0. 008372  
0. 44108 0. 008341  
0. 332267 0. 027812  
0. 313578 0. 012004  
0. 295828 0. 030165  
0. 294387 0. 040873  
0. 28835 0. 034888



0. 276769 0. 014805  
0. 273764 0. 007904  
0. 260228 0. 02754  
0. 253538 0. 026018  
0. 239737 0. 002661  
0. 23002 0. 005702  
0. 21913 0. 012865  
0. 209547 0. 044893  
0. 191872 0. 000201  
0. 168305 0. 010161  
0. 160021 0. 024076  
0. 152797 0. 048946  
0. 15218 0. 007952  
0. 151449 0. 035557  
0. 140785 0. 020949  
0. 131215 0. 0002  
0. 119863 0. 021205  
0. 117144 0. 034901  
0. 094589 0. 034336
